# Supplementary material for: Inclusion complexes of fullerenes with flexible tetrathiafulvalene derivatives bearing four aryls through sulfur bridges
Source: Royal Society of Chemistry journal article supplement (doi:10.1039/c4tc01362j), 2014-07-25
Supplement: c4tc01362j1.pdf [file c4tc01362j1.pdf]

## Electronic Supplementary Information

# Inclusion Complexes of Fullerenes with Flexible Tetrathiafulvalene Derivatives Bearing Four Aryls through the Sulfur Bridges

Jibin Sun,<sup>a</sup> Xiaofeng Lu,<sup>a</sup> Manabu Ishikawa,<sup>b</sup> Yoshiaki Nakano,<sup>b</sup> Shangxi Zhang,<sup>a</sup> Jinlian Zhao,<sup>a</sup> Yongliang Shao,<sup>a</sup> Zhaohui Wang,<sup>c</sup> Hideki Yamochi,<sup>b</sup> and Xiangfeng Shao<sup>a\*</sup>

<sup>a</sup> *State Key Laboratory of Applied Organic Chemistry, Lanzhou University, Tianshui Southern Road 222, Lanzhou 730000, Gansu Province, P. R. China*

<sup>b</sup> *Research Centre for Low Temperature and Materials Sciences, Kyoto University, Sakyo-ku, Kyoto 606-8501, Japan*

<sup>c</sup> *Key Laboratory of Organic Solids, Institute of Chemistry, Chinese Academy of Science, Beijing 100089, P. R. China*

Email: [shaoxf@lzu.edu.cn](mailto:shaoxf@lzu.edu.cn) (X. S.)

## Experimental

Chlorobenzene (PhCl) and carbon disulfide (CS<sub>2</sub>) were distilled over P<sub>2</sub>O<sub>5</sub> under inert condition and stored in the long-necked flask under the argon atmosphere. **TTF1–TTF3** were prepared according to the method reported in the literature,<sup>[1]</sup> and further purified by recrystallization from CH<sub>2</sub>Cl<sub>2</sub>/*n*-hexane to give red crystalline samples. **C<sub>60</sub>** and **C<sub>70</sub>** were purchased from J&K chemicals (Beijing), and further purified by recrystallization from toluene.

Complex **TTF1•C<sub>60</sub>•CS<sub>2</sub>** was prepared by slow evaporation of the mixed solution of **TTF1** and **C<sub>60</sub>** in CS<sub>2</sub> at room temperature (RT). After 5 days, the black platelet single crystals were formed. Complex **TTF2•C<sub>60</sub>** was prepared by slow evaporation of the mixed solution of **TTF2** and **C<sub>60</sub>** in PhCl at RT. After 20 days, the black platelet single crystals were formed. **TTF3•(C<sub>70</sub>)<sub>2</sub>•(PhCl)<sub>2</sub>** were prepared by slowly evaporation of the mixed solution of **TTF3** and **C<sub>70</sub>** in PhCl at RT. After 20 days, the black platelet single crystals were formed.

**Table S1.** Experimental conditions for the preparation of inclusion complexes

| <b>TTF</b>            | <b>Fullerene</b>                | <b>Solvent</b>                | <b>Complex</b>                                                          | <b>Appearance</b> |
|-----------------------|---------------------------------|-------------------------------|-------------------------------------------------------------------------|-------------------|
| <b>TTF1</b> , 34.1 mg | <b>C<sub>60</sub></b> , 14.4 mg | <b>CS<sub>2</sub></b> , 14 mL | <b>TTF1•C<sub>60</sub>•CS<sub>2</sub></b> , 29.2 mg                     | Black block       |
| <b>TTF2</b> , 6.9 mg  | <b>C<sub>60</sub></b> , 14.4 mg | <b>PhCl</b> , 14 mL           | <b>TTF2•C<sub>60</sub></b> , 8.2 mg                                     | Black plates      |
| <b>TTF3</b> , 13.8 mg | <b>C<sub>70</sub></b> , 8.4 mg  | <b>PhCl</b> , 10 mL           | <b>TTF3•(C<sub>70</sub>)<sub>2</sub>•(PhCl)<sub>2</sub></b> ,<br>6.0 mg | Black prism       |

The X-ray diffraction measurement was carried out on SuperNova (Agilent) type diffractometer. The crystal structures of complexes **TTF1•C<sub>60</sub>•CS<sub>2</sub>**, **TTF2•C<sub>60</sub>**, and **TTF3•(C<sub>70</sub>)<sub>2</sub>•(PhCl)<sub>2</sub>** were solved by a direct method *SIR2004*<sup>[2]</sup> and refined by full-matrix least-squares method on *F<sup>2</sup>* by means of *SHELXL-97*.<sup>[3]</sup> The calculated positions of the hydrogen atoms were included in the final refinement. The selected crystallographic data are summarized in Table S2. The UV-vis spectra in chlorobenzene (PhCl) solution (10<sup>-4</sup> mol L<sup>-1</sup>) were measured at 20 °C on Lambda 950 spectrometer (PerkinElmer). The absorption spectra were measured on the solid state by dispersing the complexes on the KBr pellet. The infrared (IR) spectra (400–7500 cm<sup>-1</sup>) were recorded on the PerkinElmer Spectrum 400 spectrometer with the resolution of 2 cm<sup>-1</sup>. The UV-vis-NIR in KBr (3800–42000 cm<sup>-1</sup>) were recorded on the PerkinElmer Lambda1050 spectrometer.

**Table S2.** Selected crystallographic data for complexes **TTF1•C<sub>60</sub>•CS<sub>2</sub>**, **TTF2•C<sub>60</sub>**, and **TTF3•(C<sub>70</sub>)<sub>2</sub>•(PhCl)<sub>2</sub>**.

|                                         | <b>TTF1•C<sub>60</sub>•CS<sub>2</sub></b>                      | <b>TTF2•C<sub>60</sub></b>                     | <b>TTF3•(C<sub>70</sub>)<sub>2</sub>•(PhCl)<sub>2</sub></b>     |
|-----------------------------------------|----------------------------------------------------------------|------------------------------------------------|-----------------------------------------------------------------|
| CCDC number                             | 986605                                                         | 986606                                         | 986607                                                          |
| Empirical formula                       | C <sub>95</sub> H <sub>28</sub> O <sub>4</sub> S <sub>10</sub> | C <sub>94</sub> H <sub>28</sub> S <sub>8</sub> | C <sub>186</sub> H <sub>38</sub> Cl <sub>2</sub> S <sub>8</sub> |
| Formula weight                          | 1553.77                                                        | 1413.64                                        | 2599.54                                                         |
| Temperature [K]                         | 113(2)                                                         | 113(2)                                         | 100(2)                                                          |
| $\lambda$ [Å]                           | 0.71075                                                        | 0.71075                                        | 0.71075                                                         |
| Crystal size [mm <sup>3</sup> ]         | 0.35×0.27×0.10                                                 | 0.32×0.10×0.06                                 | 0.43×0.14×0.06                                                  |
| Crystal system                          | triclinic                                                      | triclinic                                      | monoclinic                                                      |
| space group                             | $P\bar{1}$                                                     | $P\bar{1}$                                     | $P2_1/c$                                                        |
| $a$ [Å]                                 | 10.283(4)                                                      | 10.346(8)                                      | 21.567(2)                                                       |
| $b$ [Å]                                 | 10.340(4)                                                      | 10.452(9)                                      | 21.385(2)                                                       |
| $c$ [Å]                                 | 16.018(7)                                                      | 13.714(12)                                     | 45.525(4)                                                       |
| $\alpha$ [°]                            | 103.299(5)                                                     | 88.75(3)                                       | 90                                                              |
| $\beta$ [°]                             | 104.031(5)                                                     | 86.12(3)                                       | 90.307(1)                                                       |
| $\gamma$ [°]                            | 100.895(7)                                                     | 79.37(3)                                       | 90                                                              |
| $V$ [Å <sup>3</sup> ]                   | 1553(1)                                                        | 1454(2)                                        | 20996(3)                                                        |
| $Z$                                     | 1                                                              | 1                                              | 8                                                               |
| $d_{\text{calc}}$ [g·cm <sup>-3</sup> ] | 1.661                                                          | 1.614                                          | 1.645                                                           |
| $\mu$ [mm <sup>-1</sup> ]               | 0.42                                                           | 0.368                                          | 0.296                                                           |
| $2\theta_{\text{max}}$ [°]              | 55.72                                                          | 55.92                                          | 58.60                                                           |
| Data/restraints/parameters              | 4845/0/494                                                     | 3788/0/461                                     | 51781/0/3529                                                    |
| $Goof$                                  | 0.981                                                          | 0.994                                          | 1.097                                                           |
| $R$ [ $I > 2\sigma(I)$ ]                | 0.043                                                          | 0.074                                          | 0.082                                                           |
| $wR_2$                                  | 0.1177                                                         | 0.1652                                         | 0.1793                                                          |

## References

- [1] a) J. Sun, X. Lu, J. Shao, X. Li, S. Zhang, B. Wang, J. Zhao, Y. Shao, R. Fang, Z. Wang, W. Yu and X. Shao, *Chem. Eur. J.*, 2013, **19**, 12517. b) J. Sun, X. Lu, J. Shao, Z. Cui, Y. Shao, G. Jiang, W. Yu and X. Shao, *RSC Adv.*, 2013, **3**, 10193
- [2] M. C. Burla, R. Caliendo, M. Camalli, B. Carrozzini, G. L. Casciarano, L. de Caro, C. Giacovazzo, G. Polidori and R. Spagna, *J. Appl. Cryst.*, 2005, **38**, 381–388.
- [3] G. M. Sheldrick, *SHELXL-97, A Program for Crystal Structure Refinement*. University of Göttingen, Göttingen, Germany, 1997.

## Crystal structures

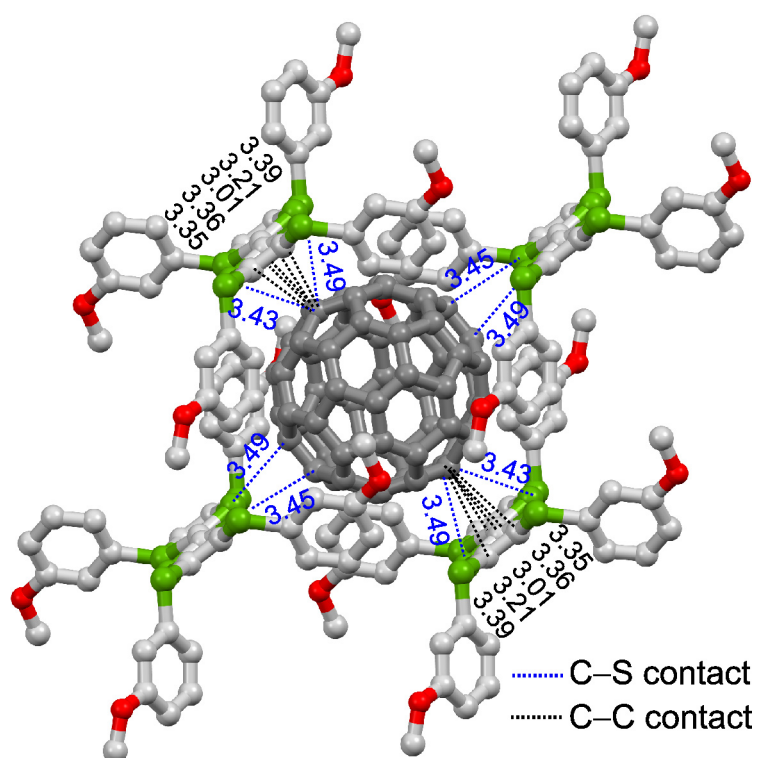

**Fig. S1** Intermolecular atomic short contacts (blue and black dashed lines for C-S and C-C contacts respectively) between TTF1 and C<sub>60</sub> in TTF1•C<sub>60</sub>•CS<sub>2</sub>. The C–C atomic short contacts between the aryls and C<sub>60</sub> are also observed: 3.27, 3.32, 3.37, and 3.38 Å.

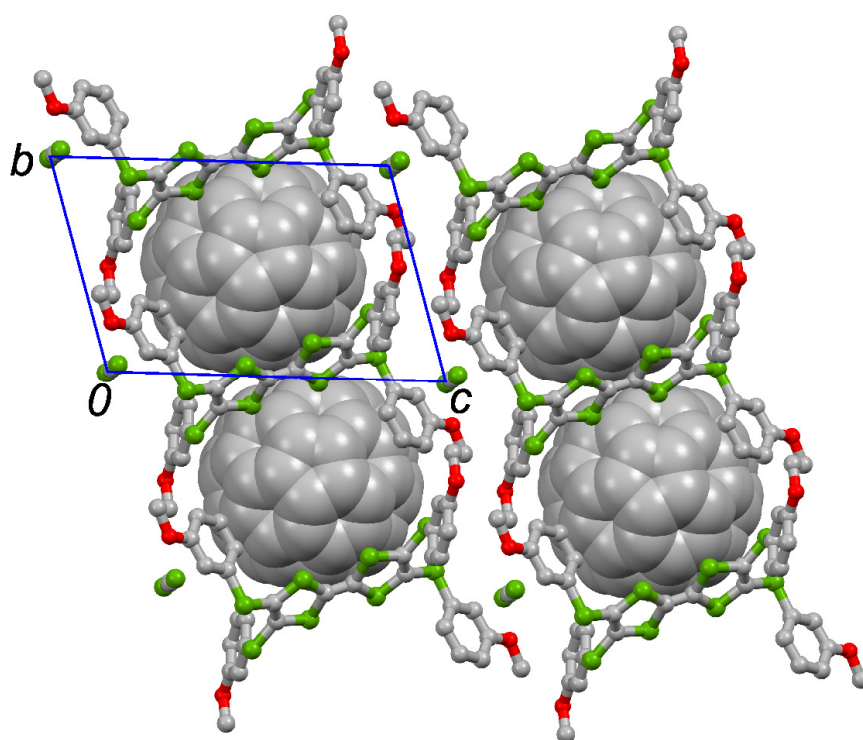

**Fig. S2** Crystal structure of TTF1•C<sub>60</sub>•CS<sub>2</sub> projected along the *a*-axis.

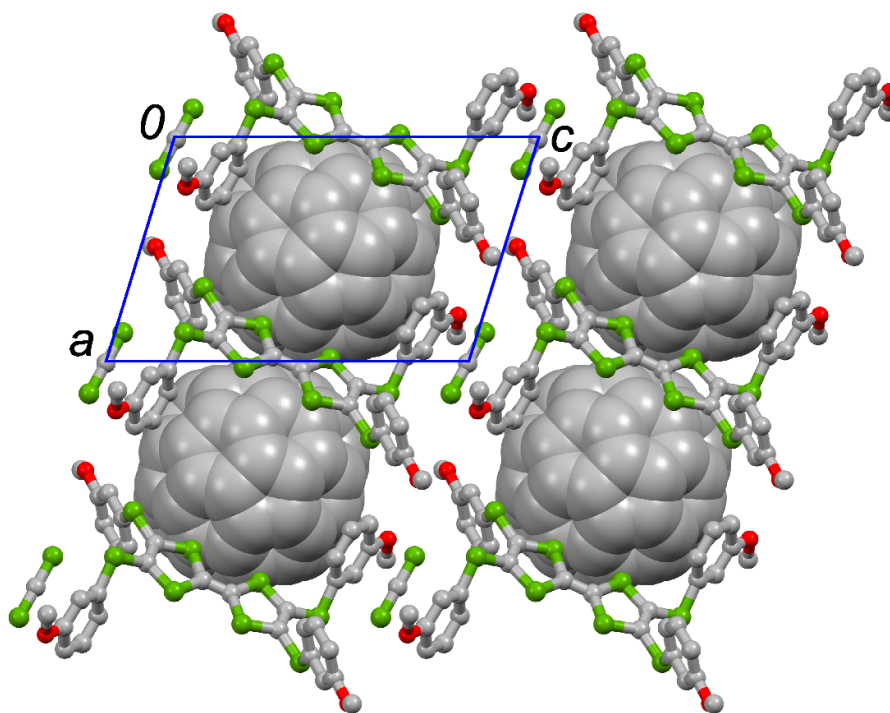

**Fig. S3** Crystal structure of  $\text{TTF1}\cdot\text{C}_{60}\cdot\text{CS}_2$  projected along the  $b$ -axis.

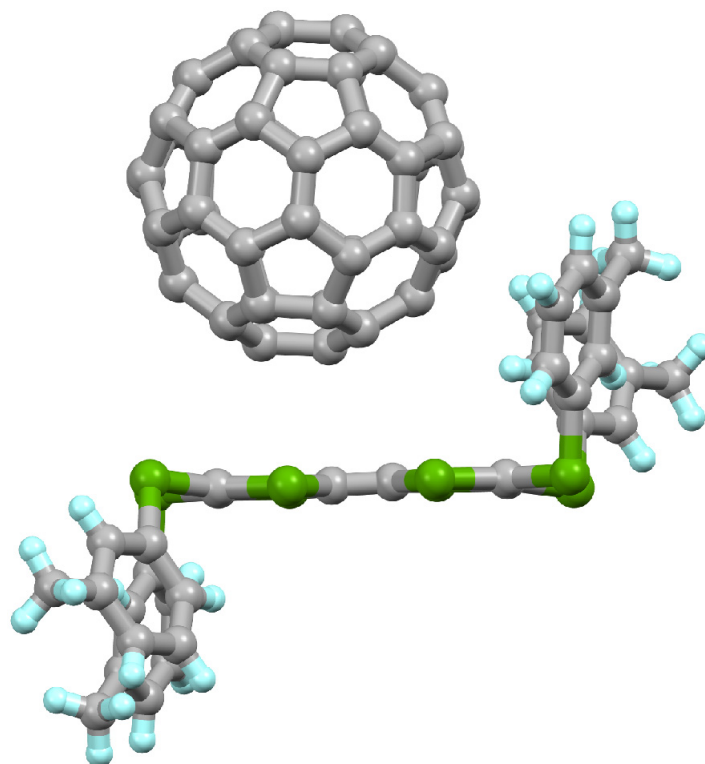

**Fig. S4** Unit cell contents of  $\text{TTF2}\cdot\text{C}_{60}$  viewed along the short axis of  $\text{TTF2}$ . The grey, green, and cyan balls represent carbon, sulfur, and hydrogen atoms, respectively. The asymmetric unit contains  $\frac{1}{2}$   $\text{C}_{60}$  and  $\frac{1}{2}$   $\text{TTF2}$ . The centers of  $\text{C}_{60}$  and  $\text{TTF2}$  molecules are located at  $(0.5, 0.5, 0.5)$  and  $(0, 0, 0.5)$  respectively. Thus, the  $\text{C}_{60}$  molecule is encapsulated by four  $\text{TTF2}$  molecules.

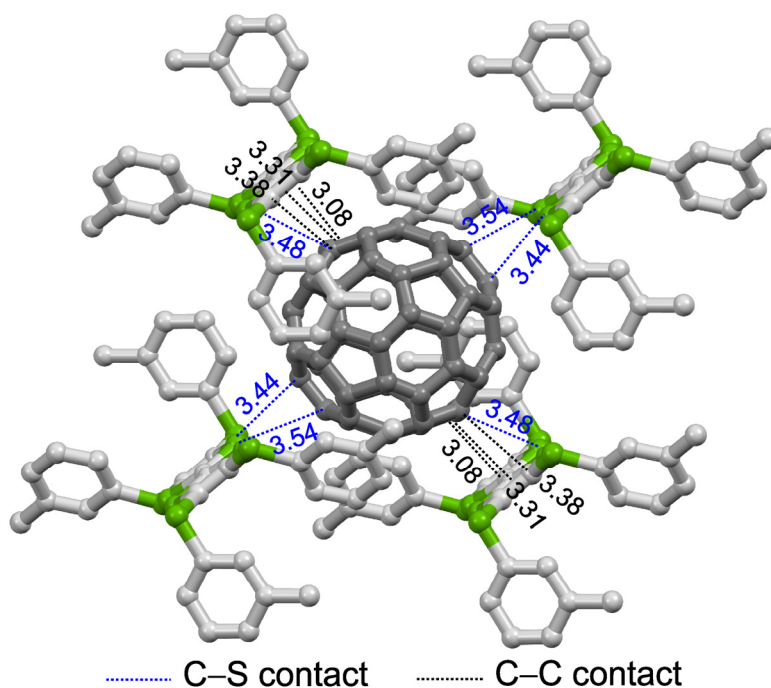

**Fig. S5** Intermolecular atomic short contacts (blue and black dashed lines for C-S and C-C contacts respectively) between central core of **TTF2** and **C<sub>60</sub>** in **TTF2•C<sub>60</sub>**. The C–C atomic short contacts are also observed between the aryls and **C<sub>60</sub>**: 3.27 and 3.38 Å. The grey and green balls represent carbon and sulfur atoms respectively, and the hydrogen atoms are omitted for clarity.

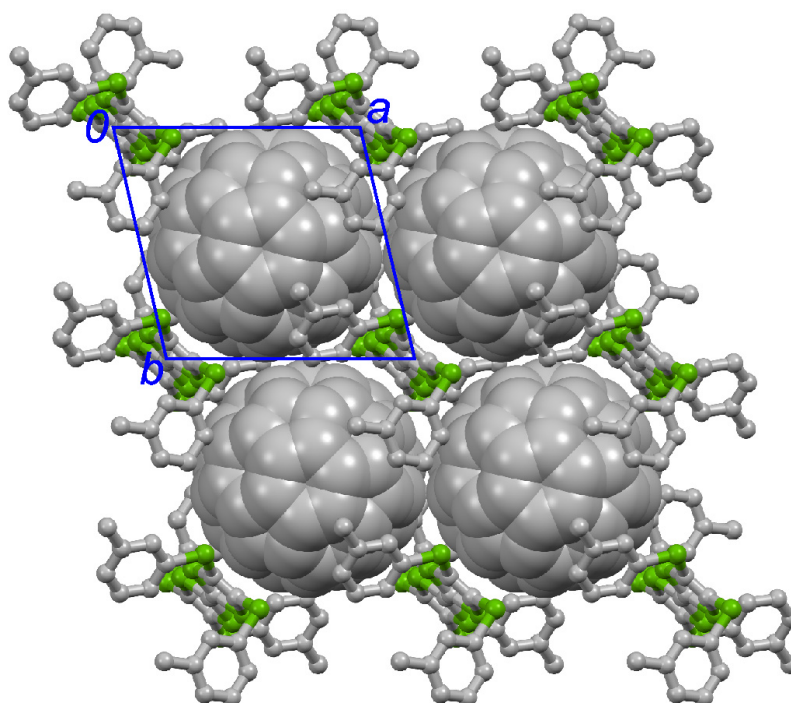

**Fig. S6** Crystal structure of **TTF2•C<sub>60</sub>** projected along the crystallographic *c*-axis with hydrogen atoms omitted for clarity. The centre-to-centre distances between neighbouring **C<sub>60</sub>** molecules along the *a*- and *b*-axes are 10.35 and 10.45 Å respectively.

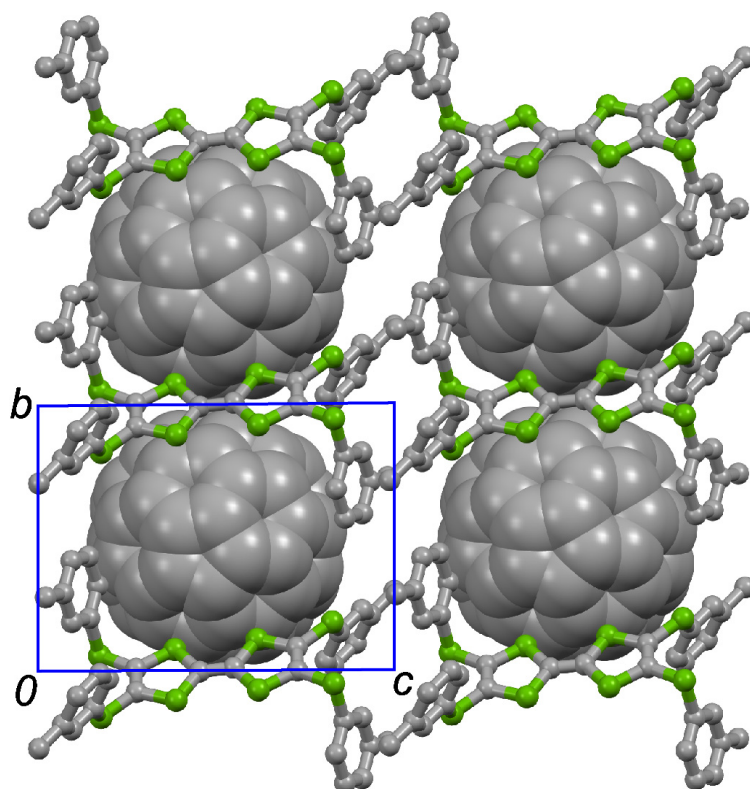

**Fig. S7** Crystal structure of  $\text{TTF2}\cdot\text{C}_{60}$  projected along the crystallographic  $a$ -axis. The  $\text{C}_{60}$  molecules are drawn in spacefill style and the hydrogen atoms are omitted for clarity.

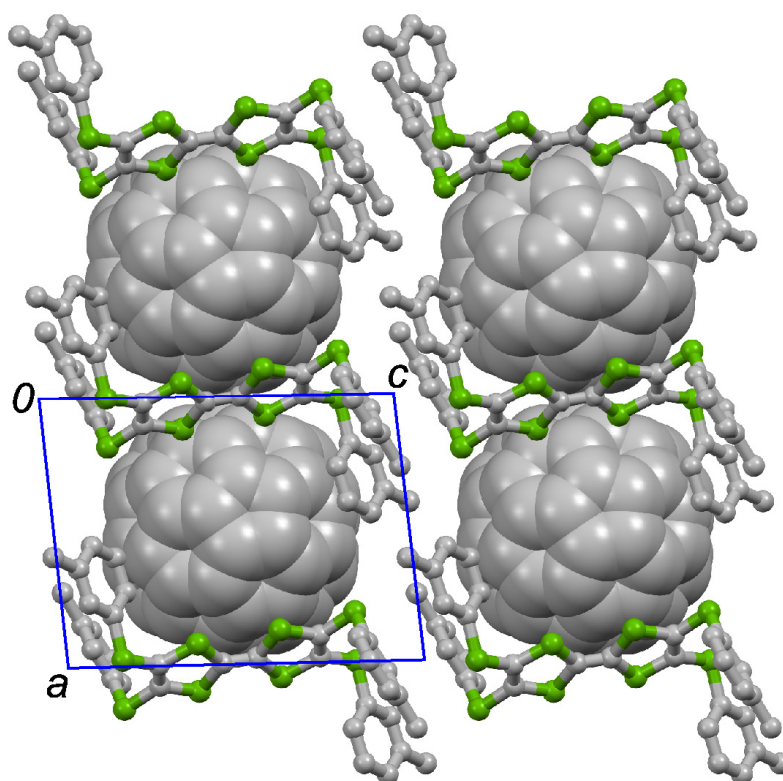

**Fig. S8** Crystal structure of  $\text{TTF2}\cdot\text{C}_{60}$  projected along the crystallographic  $b$ -axis. The  $\text{C}_{60}$  molecules are drawn in spacefill style and the hydrogen atoms are omitted for clarity.

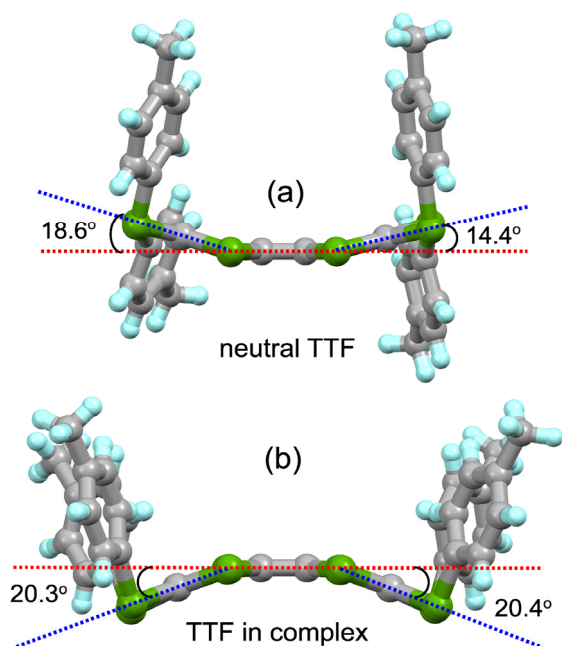

**Fig. S9** Molecular geometry of **TTF3** in the pure neutral crystal and in the complex **TTF3•(C<sub>70</sub>)<sub>2</sub>•(PhCl)<sub>2</sub>**. The figure shows the molecular geometry of TTF molecule **A** in complex, and that of TTF molecule **B** is almost identical to this depiction. The red and blue dashed lines represent the mean planes of central C<sub>2</sub>S<sub>4</sub> and terminal C<sub>2</sub>S<sub>2</sub> framework of TTF skeleton, respectively.

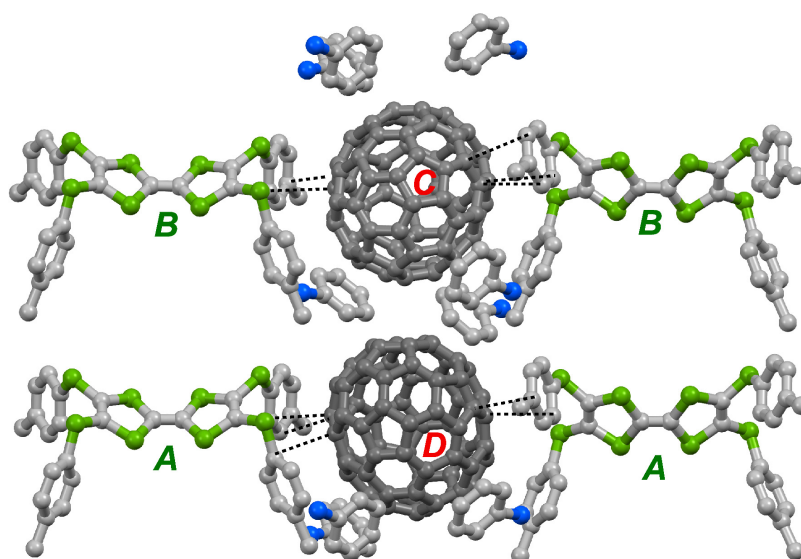

**Fig. S10** Encapsulation of **C<sub>70</sub>** molecules (**C** and **D**) by **TTF3** molecules (**A** and **B**) and solvent molecule **PhCl** in **TTF3•(C<sub>70</sub>)<sub>2</sub>•(PhCl)<sub>2</sub>**. The black dashed lines indicate the intermolecular C–C atomic short contacts between the TTF3 and **C<sub>70</sub>**. The atomic close contacts were also observed between the **PhCl** molecules and **C<sub>70</sub>** molecules. For molecule **C**, short contacts with **PhCl** molecules **J** and **K** are observed: two C–Cl contacts (3.39 and 3.44 Å) and two C–C contacts (3.29 and 3.35 Å). For molecule **D**, short contacts between it and **PhCl** molecules **L** and **M** are observed: one C–Cl contact of 3.40 Å and two C–C contacts (3.29 and 3.37 Å).



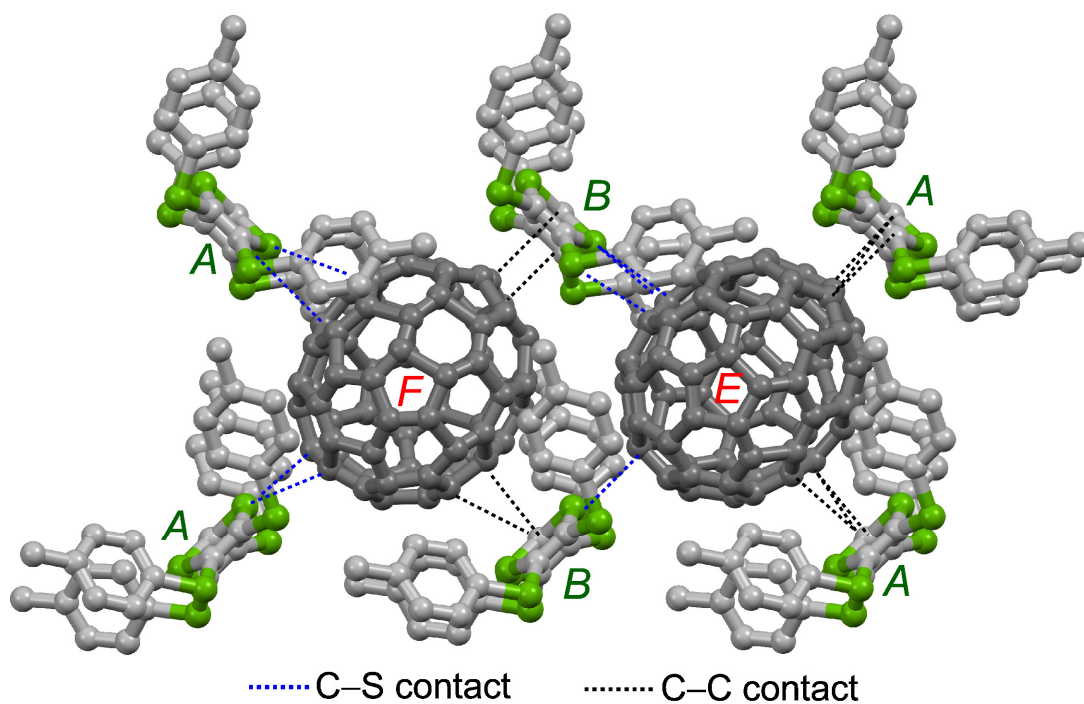

**Fig. S11** Encapsulation of  $C_{70}$  molecules ( $E$  and  $F$ ) by TTF3 molecules ( $A$  and  $B$ ) in complex  $TTF3 \cdot (C_{70})_2 \cdot (PhCl)_2$ . The black and blue dashed lines indicate the intermolecular C–C and C–S atomic short contacts respectively.

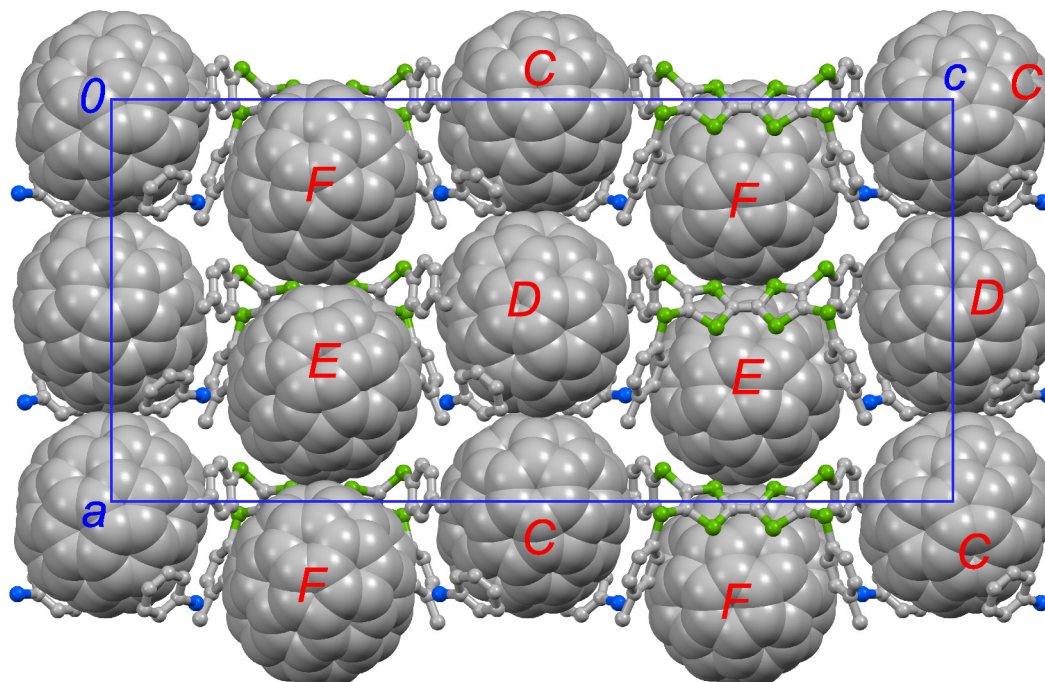

**Fig. S12** Crystal structure of  $TTF3 \cdot (C_{70})_2 \cdot (PhCl)_2$  projected along the crystallographic  $b$ -axis at  $y = 0.5$ . The  $C_{70}$  molecules ( $C$ ,  $D$ ,  $E$ , and  $F$ ) are drawn in the space-filled mode.

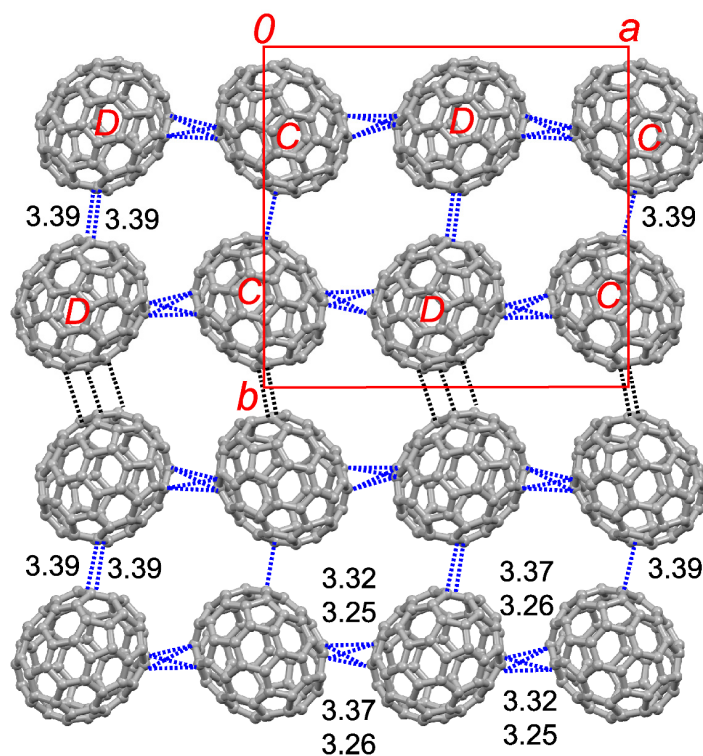

**Fig. S13** Arrangement of  $C_{70}$  molecules in  $ab$ -plane at  $z = 0$  in complex  $TTF3 \cdot (C_{70})_2 \cdot (PhCl)_2$ . The blue dashed lines with numbers indicate the intermolecular C–C close contacts, and the black dashed lines indicate the pseudo C–C contacts, which are 3.42 Å.

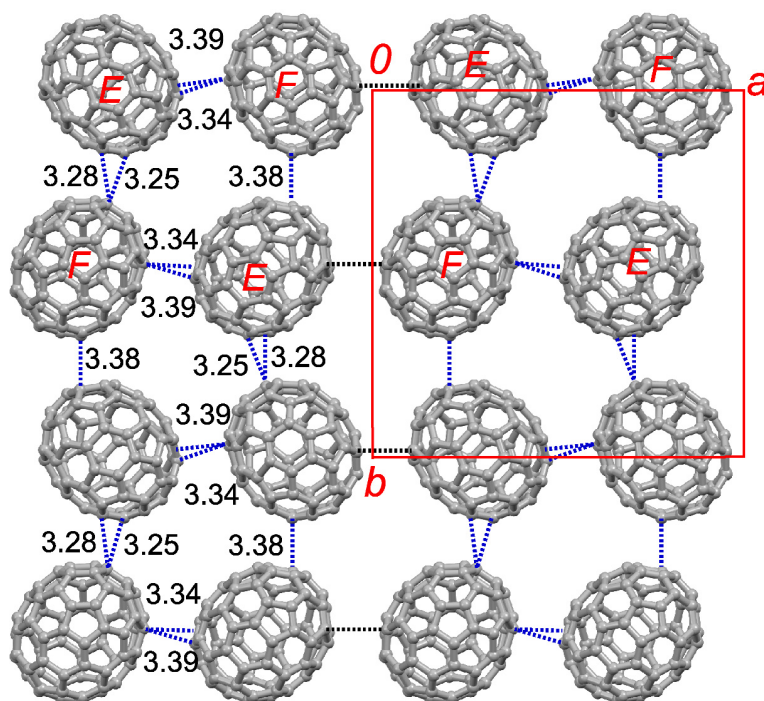

**Fig. S14** Arrangement of  $C_{70}$  molecules in  $ab$ -plane at  $z = 0.5$  in complex  $TTF3 \cdot (C_{70})_2 \cdot (PhCl)_2$ . The blue dashed lines with numbers indicate the intermolecular close C–C contacts, and the black dashed lines indicate the pseudo C–C contacts, which are 3.42 Å.

## Optical absorption spectra

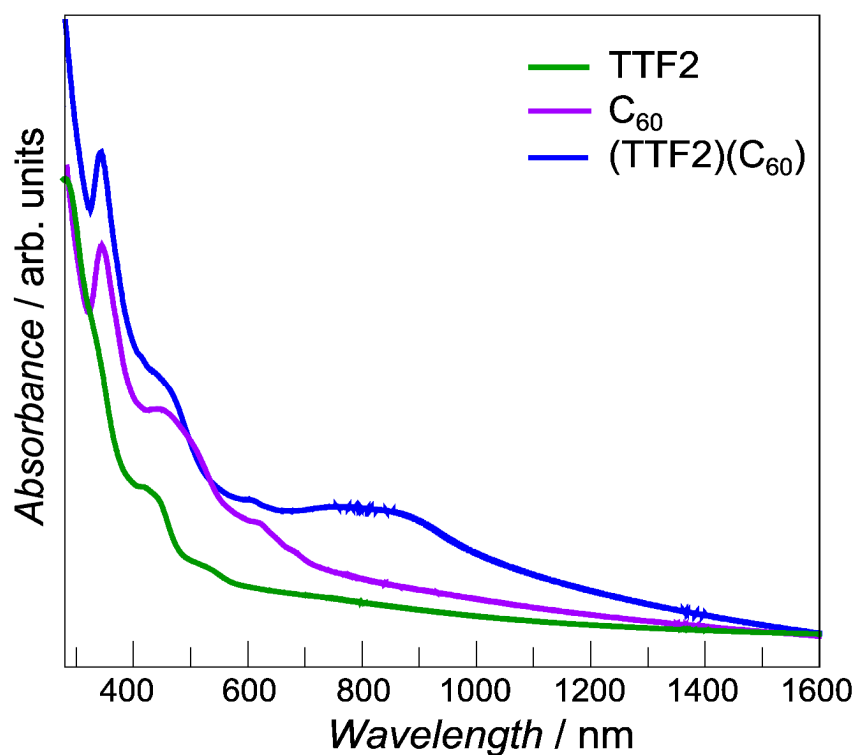

**Fig. S15** Solid state absorption spectra of  $\text{TTF2}\cdot\text{C}_{60}$  along with those of  $\text{TTF2}$  and  $\text{C}_{60}$  for comparison. The spectra were measured on the dispersed samples in KBr pellet.

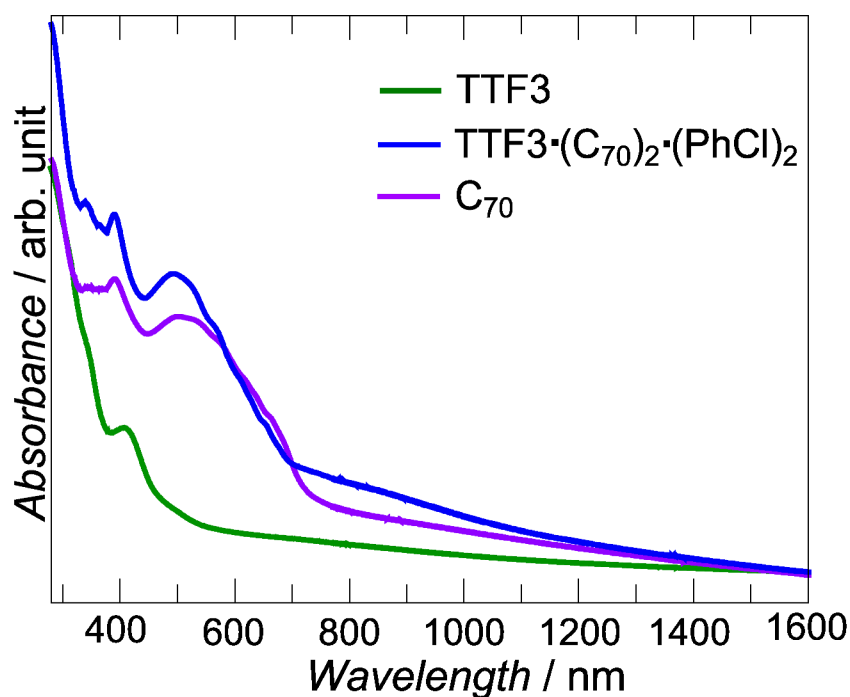

**Fig. S16** Solid state absorption spectra of  $\text{TTF3}\cdot(\text{C}_{70})_2\cdot(\text{PhCl})_2$  along with those of  $\text{TTF3}$  and  $\text{C}_{70}$  for comparison. The spectra were measured on the dispersed samples in KBr pellet.

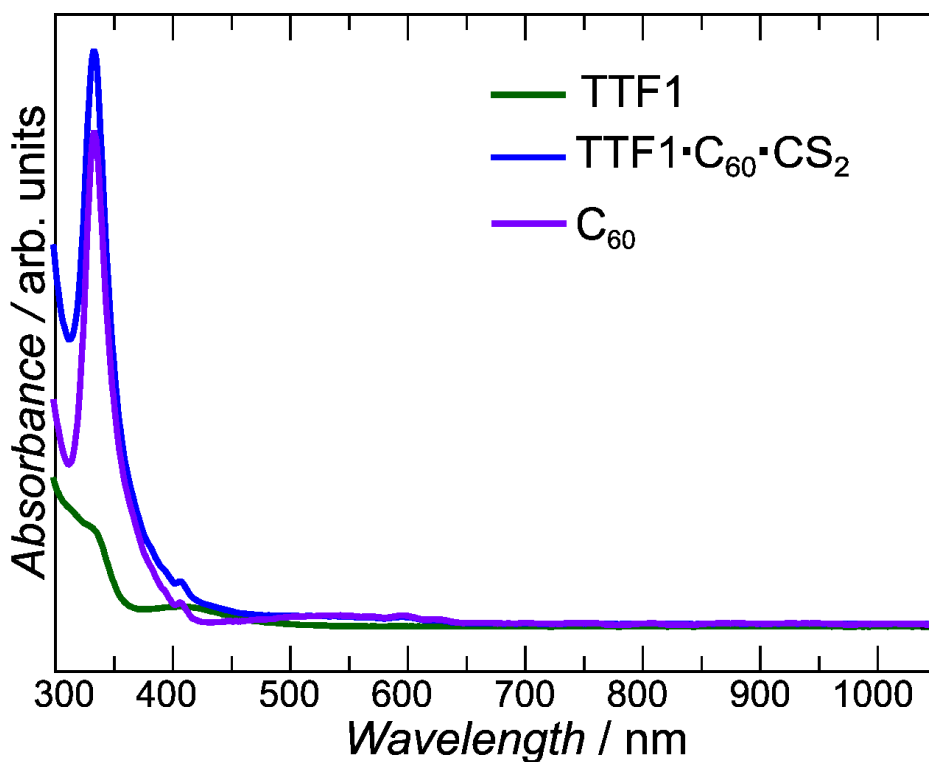

**Fig. S17** UV-Vis absorption spectra of  $\text{TTF1}\cdot\text{C}_{60}\cdot\text{CS}_2$  in PhCl solution ( $C = 10^{-4} \text{ mol L}^{-1}$ ), along with those of TTF1 and  $\text{C}_{60}$  for comparison.

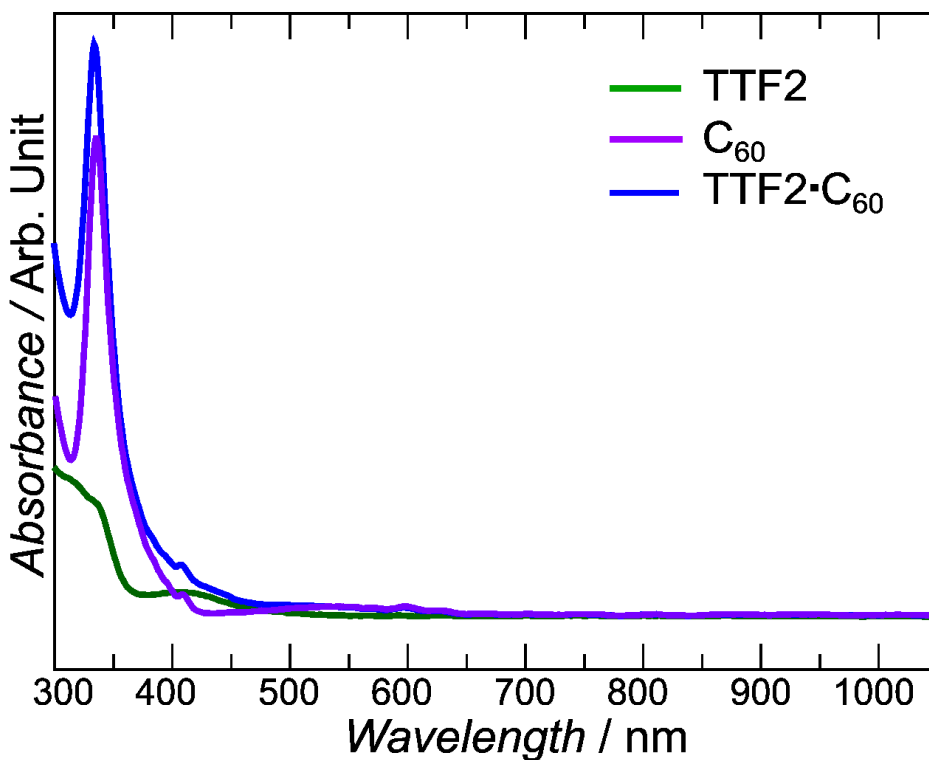

**Fig. S18** UV-Vis absorption spectra of  $\text{TTF2}\cdot\text{C}_{60}$  in PhCl solution ( $C = 10^{-4} \text{ mol L}^{-1}$ ), along with those of TTF2 and  $\text{C}_{60}$  for comparison.

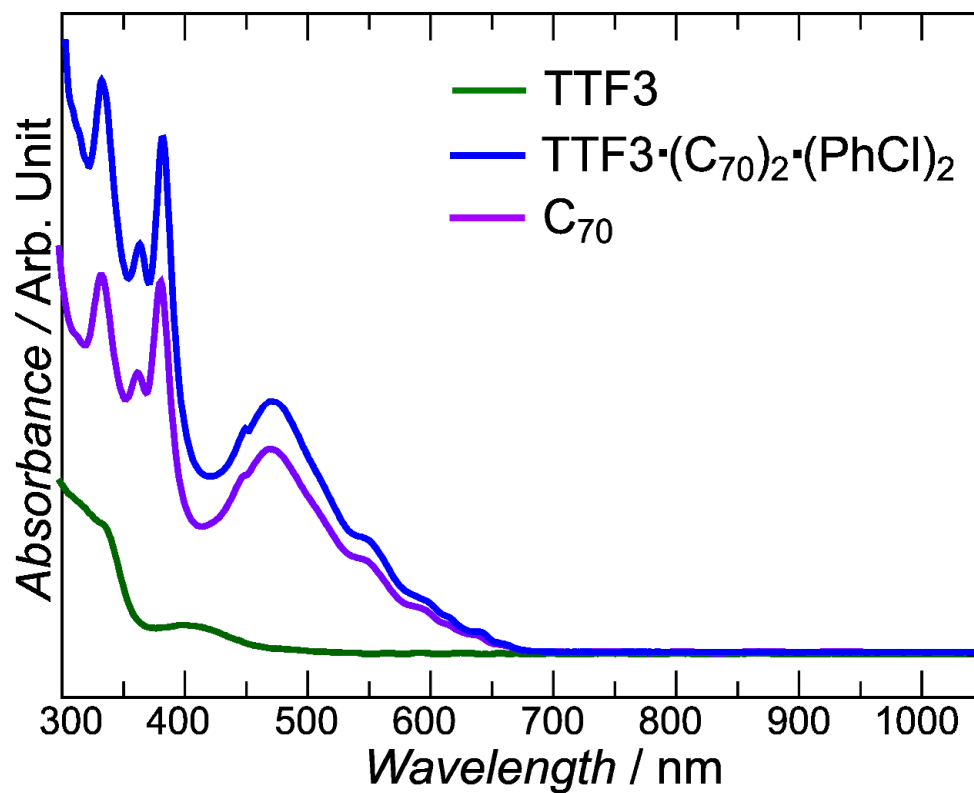

**Fig. S19** UV-Vis absorption spectra of **TTF3·(C<sub>70</sub>)<sub>2</sub>·PhCl<sub>2</sub>** in PhCl solution ( $C = 10^{-4}$  mol L<sup>-1</sup>), along with those of **TTF3** and **C<sub>70</sub>** for comparison.

## IR spectra

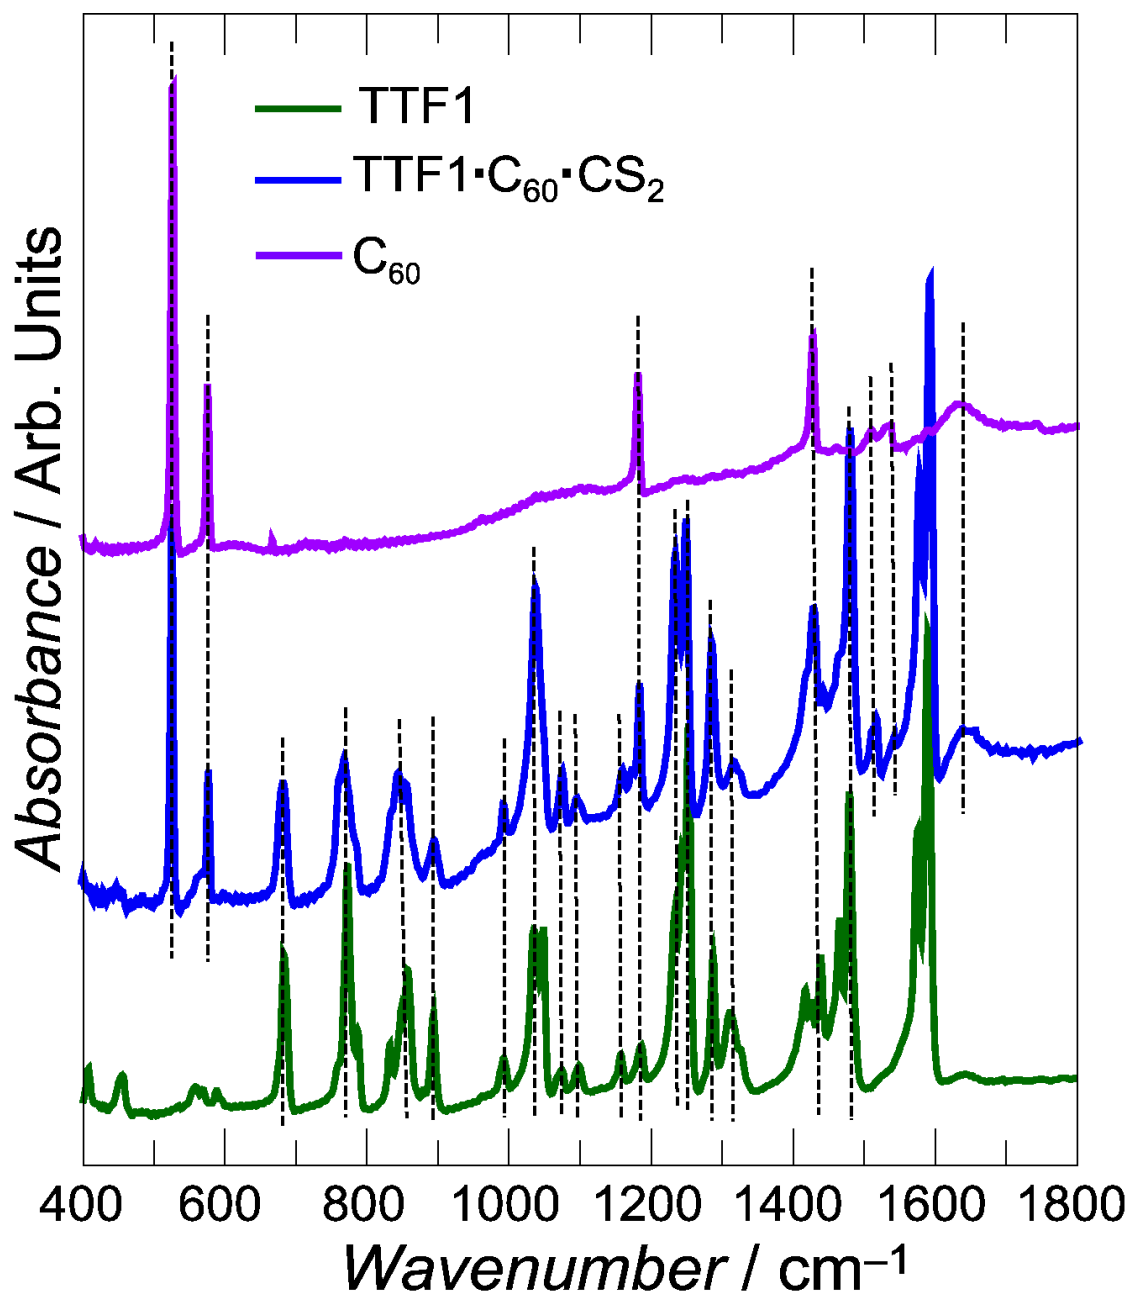

**Fig. S20** IR spectra of  $\text{TTF1}\cdot\text{C}_{60}\cdot\text{CS}_2$  along with those of TTF1 and  $\text{C}_{60}$  for comparison (in KBr). The black dashed lines are guides for the eye.

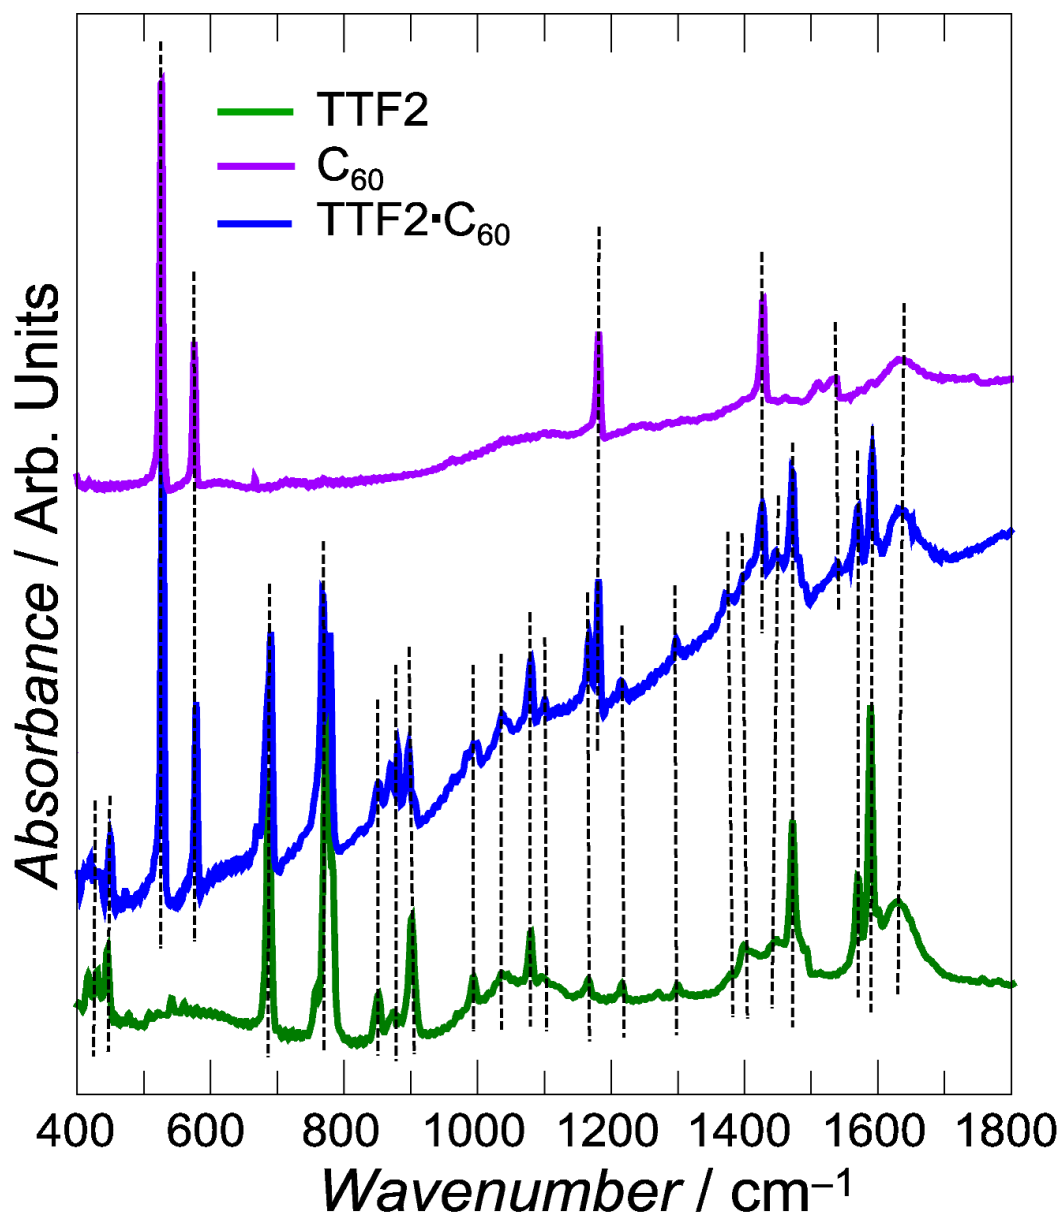

**Fig. S21** IR spectra of TTF2·C<sub>60</sub> along with those of TTF2 and C<sub>60</sub> for comparison (in KBr). The black dashed lines are guides for the eye.

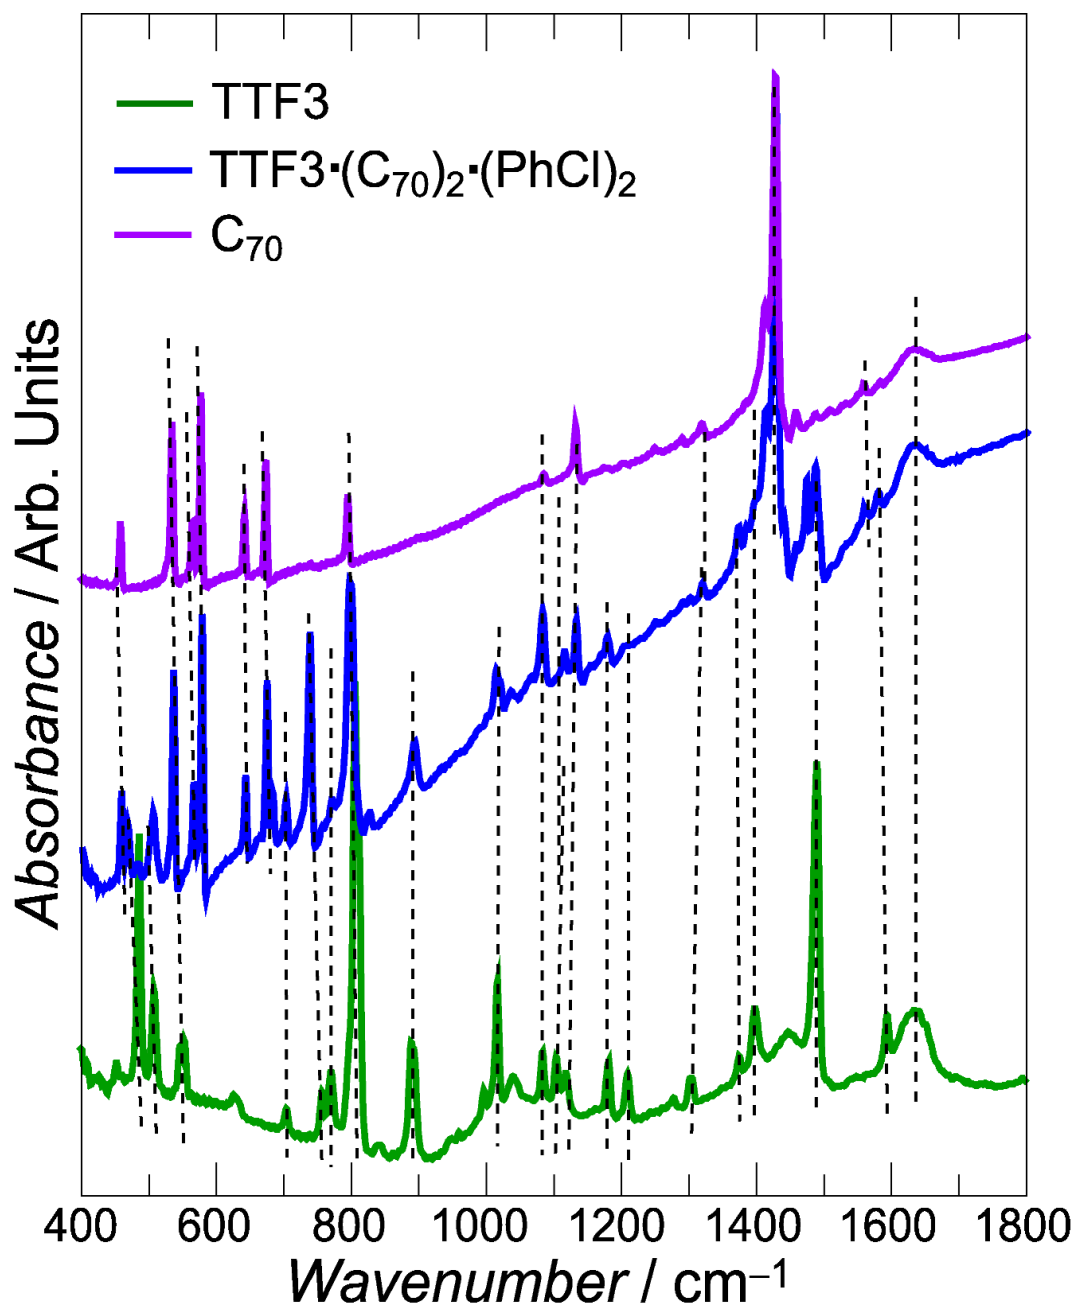

**Fig. S22** IR spectra of TTF3·C<sub>70</sub>)<sub>2</sub>·(PhCl)<sub>2</sub> along with those of TTF3 and C<sub>70</sub> for comparison (in KBr). The black dashed lines are guides for the eye.



## Theoretical calculations

The electronic structures of ground ( $S_0$ ) and excited states ( $S_n$ ,  $n \geq 1$ ) were investigated by density functional theory (DFT) and time-dependent DFT (TD-DFT) methods based on X-ray structure without carbon disulfide and chlorobenzene molecules, respectively (Fig. S23 and Table S3). The energy diagrams of frontier orbitals for **TTF1**• $C_{60}$  and **TTF3**•( $C_{70}$ )<sub>2</sub> clusters are shown in Figs. S24–S26 and S27–S29, and the excitation properties are summarized in Table S4 and S5, respectively.

As for **TTF1**• $C_{60}$  cluster, the three functionals afforded similar frontier orbitals although the orbital energies depend on the type of functional. The highest occupied molecular orbital (HOMO) is localized on the TTF moiety, whereas the lowest unoccupied molecular orbital (LUMO), (LU+1)MO, and (LU+2)MO are located on  $C_{60}$  molecule, which are quasi-triply-degenerated. Considering the calculated charges (Table S4), TTF1 and  $C_{60}$  molecules are nearly neutral at the  $S_0$  state, which supports the result of infrared spectroscopy.

All three functionals showed that the  $S_0 \rightarrow S_1$  transitions are characterized mainly as HOMO  $\rightarrow$  LUMO excitation with very small oscillator strengths although the calculated excitation energies are significantly dependent on the type of functional, which were underestimated with B3LYP and overestimated with long-range corrected functionals, CAM-B3LYP and  $\omega$ B97X-D. The  $S_0 \rightarrow S_2$  transitions have larger oscillator strengths than the  $S_0 \rightarrow S_1$  transition, which is described mainly as HOMO  $\rightarrow$  (LU+1)MO excitation with B3LYP, and HOMO  $\rightarrow$  (LU+1)MO and (LU+2)MO excitations with CAM-B3LYP and  $\omega$ B97X-D. As for the  $S_0 \rightarrow S_3$  transitions, they are regarded mainly as HOMO  $\rightarrow$  (LU+2)MO excitation with B3LYP, HOMO  $\rightarrow$  (LU+2)MO and (LU+1)MO excitations with CAM-B3LYP, and (HO-1)MO  $\rightarrow$  LUMO with negligible oscillator strength by  $\omega$ B97X-D. Therefore, the  $S_0 \rightarrow S_2$  and  $S_0 \rightarrow S_3$  transitions with B3LYP, and the  $S_0 \rightarrow S_2$  transition with CAM-B3LYP and  $\omega$ B97X-D are dominant on the new band observed in **TTF1**• $C_{60}$ • $CS_2$  complex. In other words, all three functionals conclude that the HOMO  $\rightarrow$  (LU+1)MO and (LU+2)MO excitations are dominant on the new band although they afforded the slightly different results. Comparing the charge distribution at the  $S_2$  and  $S_3$  states with B3LYP and the  $S_2$  states with CAM-B3LYP and  $\omega$ B97X-D to the corresponding  $S_0$  states, these transitions are described as electronic transition from the neutral ground state to the charge-separated excited state.

As for **TTF3**•( $C_{70}$ )<sub>2</sub> cluster, the three functionals also afforded similar frontier orbitals with the orbital energies depending on the type of functional like the case of **TTF1**• $C_{60}$  cluster. The highest

occupied molecular orbital (HOMO) is localized on the TTF moiety, whereas the LUMO, (LU+1)MO, and (LU+2)MO are located on C<sub>70</sub>(L) molecule, and the (LU+3)MO, (LU+4)MO, and (LU+5)MO are located on C<sub>70</sub>(R) molecule, which are quasi-triply-degenerated. Considering the calculated charges (Table S5), TTF3 and C<sub>70</sub> molecules are nearly neutral at the S<sub>0</sub> state, which supports the result of infrared spectroscopy.

In the case of B3LYP functional, the low-lying transitions of S<sub>0</sub> → S<sub>1</sub>, S<sub>2</sub>, S<sub>3</sub>, S<sub>4</sub>, S<sub>5</sub>, and S<sub>6</sub> are characterized as HOMO → LUMO, (LU+1)MO, and (LU+2)MO excitations, and HOMO → (LU+3)MO, (LU+4)MO, and (LU+5)MO excitations. Also considering the calculated charges (Table S5), all these transitions are regarded as electronic transition from the neutral ground state to the charge-separated excited state.

However, the long-range corrected CAM-B3LYP functional predicted the slightly different result from the B3LYP functional. The lowest S<sub>0</sub> → S<sub>1</sub> transition is characterized as HOMO → (LU+2)MO and (LU+1)MO excitations, which is the electronic transition from the neutral ground state to the charge-separated excited state. The second and third lowest transitions of S<sub>0</sub> → S<sub>2</sub> and S<sub>3</sub> are regarded as the local excitations of C<sub>70</sub>(R) and C<sub>70</sub>(L) molecules, respectively. The fourth lowest S<sub>0</sub> → S<sub>4</sub> transition is characterized mainly as HOMO → LUMO and (LU+2)MO excitations, which is not the local, but the charge transfer excitation.

As for another long-range corrected  $\omega$ B97X-D functional, the lowest and second lowest transitions of S<sub>0</sub> → S<sub>1</sub> and S<sub>2</sub> are not described as the charge transfer, but the local excitation on C<sub>70</sub>(L) and C<sub>70</sub>(R) molecules, respectively. The third lowest S<sub>0</sub> → S<sub>3</sub> transition is regarded mainly as HOMO → (LU+2)MO and (LU+1)MO excitations, characteristic of the charge-separated excited state.

Although B3LYP, CAM-B3LYP, and  $\omega$ B97X-D afforded the slightly different results probably due to the mixing ratio of HF exchange, all three functional predicts the low-lying transition from neutral ground state to charge-separated excited state. Therefore, it is concluded that the new band observed in TTF<sub>3</sub>•(C<sub>70</sub>)<sub>2</sub>•(PhCl)<sub>2</sub> complex contains the charge transfer character from TTF3 to C<sub>70</sub> molecule.

## Computational details

Density functional theory (DFT) and time-dependent DFT (TD-DFT) calculations by B3LYP,<sup>[1]</sup> CAM-B3LYP,<sup>[2]</sup> and  $\omega$ B97X-D<sup>[3]</sup> were carried out based on X-ray structure. The solvent molecules CS<sub>2</sub> and PhCl were not included in the present calculation. B3LYP is a widely used hybrid

functional which contains 20% Hartree–Fock (HF) exchange. However, B3LYP has a tendency to underestimate the charge transfer (CT) excitation energies.<sup>[2]</sup> CAM-B3LYP and  $\omega$ B97X-D are long-range corrected functionals which are considered appropriate for CT excitations. CAM-B3LYP includes 19% HF exchange at short-range and 65% HF exchange at long-range, whereas  $\omega$ B97X-D includes 22% HF exchange at short-range and 100% HF exchange at long-range and also corrected by empirical dispersion.<sup>[4]</sup> The double- $\zeta$  basis set with polarization functions of d-type on heavy atoms and p-type on hydrogen (6-31G(d,p)<sup>[5]</sup>) was used. All of the computations were performed with the Gaussian 09 program package.<sup>[6]</sup> Natural population analyses were carried out with the NBO program.<sup>[7]</sup>

## References

- [1] K. Ragavachari, *Theor. Chem. Acc.*, 2000, **103**, 361 and references cited therein.
- [2] a) T. Yanai, D. Tew and N. Handy, *Chem. Phys. Lett.*, 2004, **393**, 51; b) M. J. G. Peach, P. Benfield, T. Helgaker and D. J. Tozer, *J. Chem. Phys.*, 2008, **128**, 044118.
- [3] J. -Da. Chai and M. Head-Gordon, *Phys. Chem. Chem. Phys.*, 2008, **10**, 6615.
- [4] S. Grimme, *J. Comput. Chem.*, 2008, **27**, 1787.
- [5] a) W. J. Hehre, R. Ditchfield and J. A. Pople, *J. Chem. Phys.*, 1972, **56**, 2257; b) P. C. Hariharan and J. A. Pople, *Mol. Phys.*, 1974, **27**, 209; c) P. C. Hariharan and J. A. Pople, *Theo. Chim. Acta* 1973, **28**, 213; d) M. M. Francl, W. J. Pietro, W. J. Hehre, J. S. Binkley, M. S. Gordon, D. J. DeFrees and J. A. Pople, *J. Chem. Phys.*, 1982, **77**, 3654.
- [6] Gaussian 09, Revision D.01, M. J. Frisch, G. W. Trucks, H. B. Schlegel, G. E. Scuseria, M. A. Robb, J. R. Cheeseman, G. Scalmani, V. Barone, B. Mennucci, G. A. Petersson, H. Nakatsuji, M. Caricato, X. Li, H. P. Hratchian, A. F. Izmaylov, J. Bloino, G. Zheng, J. L. Sonnenberg, M. Hada, M. Ehara, K. Toyota, R. Fukuda, J. Hasegawa, M. Ishida, T. Nakajima, Y. Honda, O. Kitao, H. Nakai, T. Vreven, J. A. Montgomery, Jr., J. E. Peralta, F. Ogliaro, M. Bearpark, J. J. Heyd, E. Brothers, K. N. Kudin, V. N. Staroverov, T. Keith, R. Kobayashi, J. Normand, K. Raghavachari, A. Rendell, J. C. Burant, S. S. Iyengar, J. Tomasi, M. Cossi, N. Rega, J. M. Millam, M. Klene, J. E. Knox, J. B. Cross, V. Bakken, C. Adamo, J. Jaramillo, R. Gomperts, R. E. Stratmann, O. Yazyev, A. J. Austin, R. Cammi, C. Pomelli, J. W. Ochterski, R. L. Martin, K. Morokuma, V. G. Zakrzewski, G. A. Voth, P. Salvador, J. J. Dannenberg, S. Dapprich, A. D. Daniels, O. Farkas, J. B. Foresman, J. V. Ortiz, J. Cioslowski and D. J. Fox, Gaussian, Inc., Wallingford CT, 2013.
- [7] NBO Version 3.1, E. D. Glendening, A. E. Reed, J. E. Carpenter, and F. Weinhold.

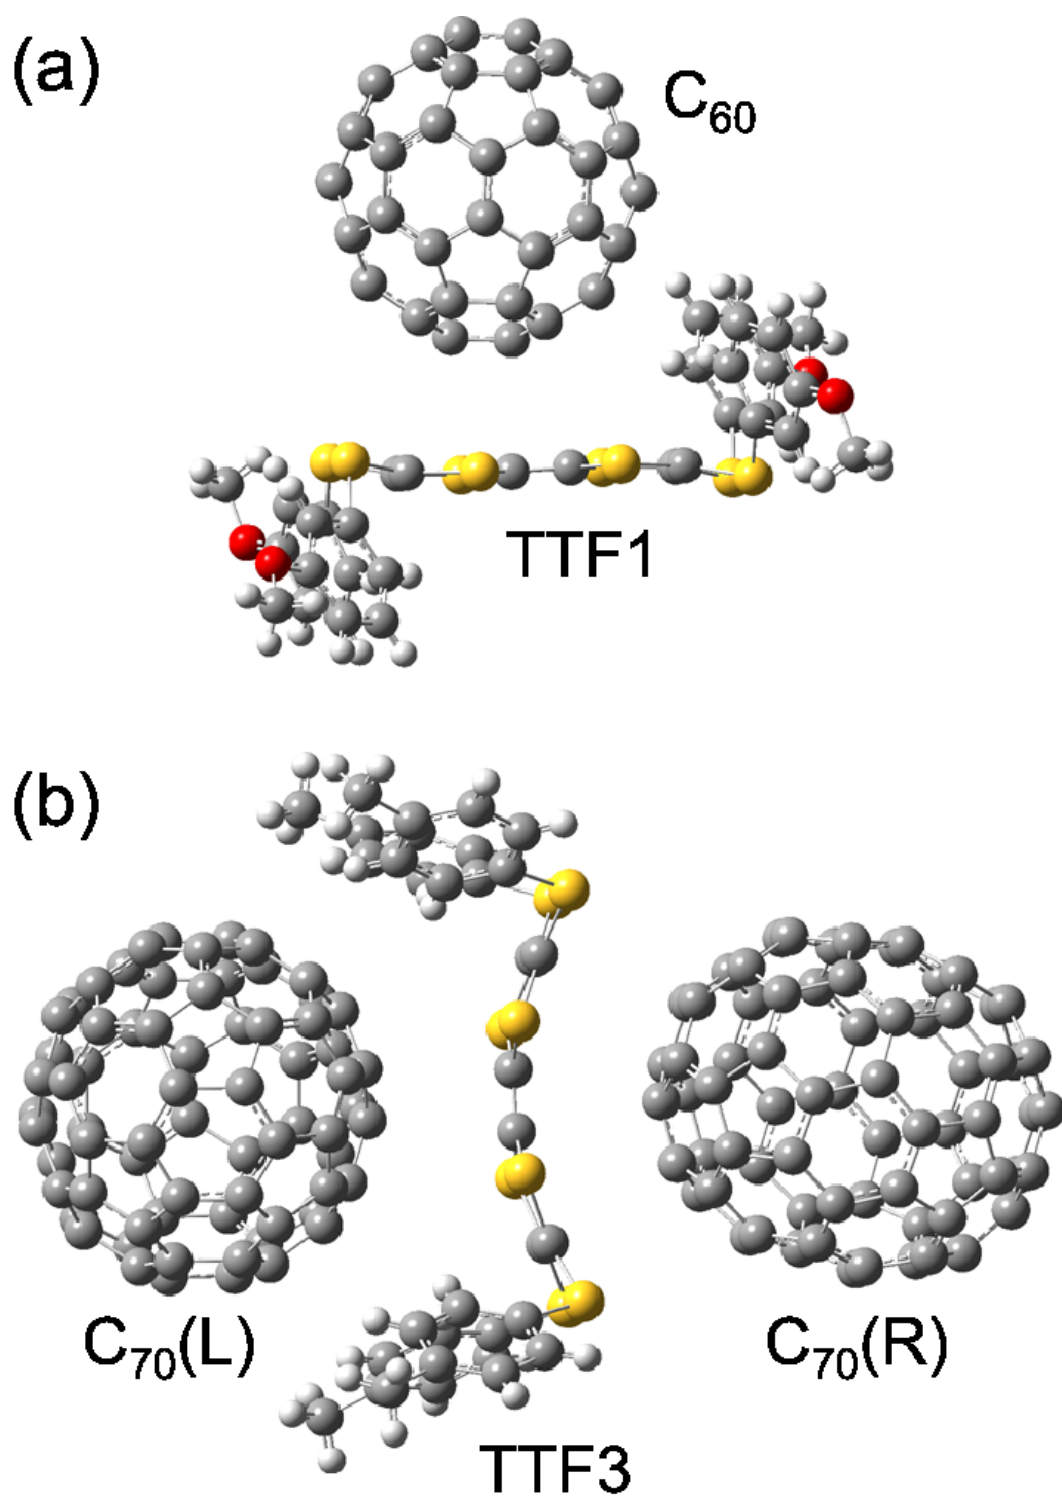

**Fig. S23** Calculated geometries of (a) TTF1• $C_{60}$  and (b) TTF3•( $C_{70}$ )<sub>2</sub> clusters, in which TTF3 is molecule A, and  $C_{70}(L)$  and  $C_{70}(R)$  are molecules E.

**Table S3.** Total energies ( $E$ ) and HOMO-LUMO gaps ( $\Delta E_{\text{HOMO-LUMO}}$ ) for **TTF1•C<sub>60</sub>** and **[C<sub>70</sub>(E)-TTF3(A)-C<sub>70</sub>(E)]** clusters calculated at the B3LYP, CAM-B3LYP, and  $\omega$ B97X-D/6-31G(d,p) levels of theory.

| Method                                                | $E$ / hartree | $\Delta E_{\text{HOMO-LUMO}}$ / eV |
|-------------------------------------------------------|---------------|------------------------------------|
| <b>TTF1•C<sub>60</sub></b>                            |               |                                    |
| B3LYP/6-31G(d,p)                                      | -7084.4158    | 1.569                              |
| CAM-B3LYP/6-31G(d,p)                                  | -7082.2940    | 3.822                              |
| $\omega$ B97X-D/6-31G(d,p)                            | -7083.0679    | 4.863                              |
| <b>[C<sub>70</sub>(E)-TTF3(A)- C<sub>70</sub>(E)]</b> |               |                                    |
| B3LYP/6-31G(d,p)                                      | -9832.0148    | 1.575                              |
| CAM-B3LYP/6-31G(d,p)                                  | -9828.3286    | 3.710                              |
| $\omega$ B97X-D/6-31G(d,p)                            | -9829.8309    | 4.737                              |

**Table S4.** Excitation energies ( $\Delta E$ ), oscillator strengths ( $f$ ), assignments, and charges<sup>[a]</sup> of TTF1 molecule by Mulliken and natural population analyses (NPA) in the ground ( $S_0$ ) and low-lying excited ( $S_1$ ,  $S_2$ , and  $S_3$ ) states for **TTF1**•**C<sub>60</sub>** cluster calculated at the TD-(B3LYP, CAM-B3LYP, and  $\omega$ B97X-D)/6-31G(d,p) levels of theory.

| State                            | $\Delta E / \text{eV}$ | $f$    | Assignment                                                                                                                                            | Mulliken | NPA    |
|----------------------------------|------------------------|--------|-------------------------------------------------------------------------------------------------------------------------------------------------------|----------|--------|
| <b>B3LYP</b>                     |                        |        |                                                                                                                                                       |          |        |
| $S_0$                            |                        |        |                                                                                                                                                       | -0.032   | +0.039 |
| $S_1$                            | 1.132                  | 0.0004 | HO $\rightarrow$ LU (99%)                                                                                                                             | +0.831   | +0.957 |
| $S_2$                            | 1.232                  | 0.0034 | HO $\rightarrow$ LU+1 (96%)<br>HO $\rightarrow$ LU+2 (3%)                                                                                             | +0.824   | +0.951 |
| $S_3$                            | 1.290                  | 0.0040 | HO $\rightarrow$ LU+2 (96%)<br>HO $\rightarrow$ LU+1 (3%)                                                                                             | +0.826   | +0.950 |
| <b>CAM-B3LYP</b>                 |                        |        |                                                                                                                                                       |          |        |
| $S_0$                            |                        |        |                                                                                                                                                       | -0.041   | +0.030 |
| $S_1$                            | 2.303                  | 0.0008 | HO $\rightarrow$ LU (88%)<br>HO $\rightarrow$ LU+3 (4%)                                                                                               | +0.784   | +0.907 |
| $S_2$                            | 2.409                  | 0.0066 | HO $\rightarrow$ LU+1 (57%)<br>HO $\rightarrow$ LU+2 (32%)<br>HO $\rightarrow$ LU+5 (4%)                                                              | +0.763   | +0.886 |
| $S_3$                            | 2.564                  | 0.0003 | HO $\rightarrow$ LU+2 (53%)<br>HO $\rightarrow$ LU+1 (33%)<br>HO-1 $\rightarrow$ LU (3%)                                                              | +0.714   | +0.830 |
| <b><math>\omega</math>B97X-D</b> |                        |        |                                                                                                                                                       |          |        |
| $S_0$                            |                        |        |                                                                                                                                                       | -0.034   | +0.030 |
| $S_1$                            | 2.496                  | 0.0010 | HO $\rightarrow$ LU (78%)<br>HO $\rightarrow$ LU+3 (6%)<br>HO $\rightarrow$ LU+4 (3%)<br>HO-5 $\rightarrow$ LU (3%)<br>HO-4 $\rightarrow$ LU (3%)     | +0.725   | +0.837 |
| $S_2$                            | 2.602                  | 0.0067 | HO $\rightarrow$ LU+1 (42%)<br>HO $\rightarrow$ LU+2 (32%)<br>HO $\rightarrow$ LU+5 (6%)<br>HO-5 $\rightarrow$ LU+2 (2%)                              | +0.657   | +0.766 |
| $S_3$                            | 2.656                  | 0.0003 | HO-1 $\rightarrow$ LU (44%)<br>HO-2 $\rightarrow$ LU (18%)<br>HO-3 $\rightarrow$ LU (13%)<br>HO-4 $\rightarrow$ LU (8%)<br>HO-6 $\rightarrow$ LU (2%) | +0.000   | +0.068 |

[a]  $C_{60}$  molecule has the charge equal in magnitude and opposite in sign.

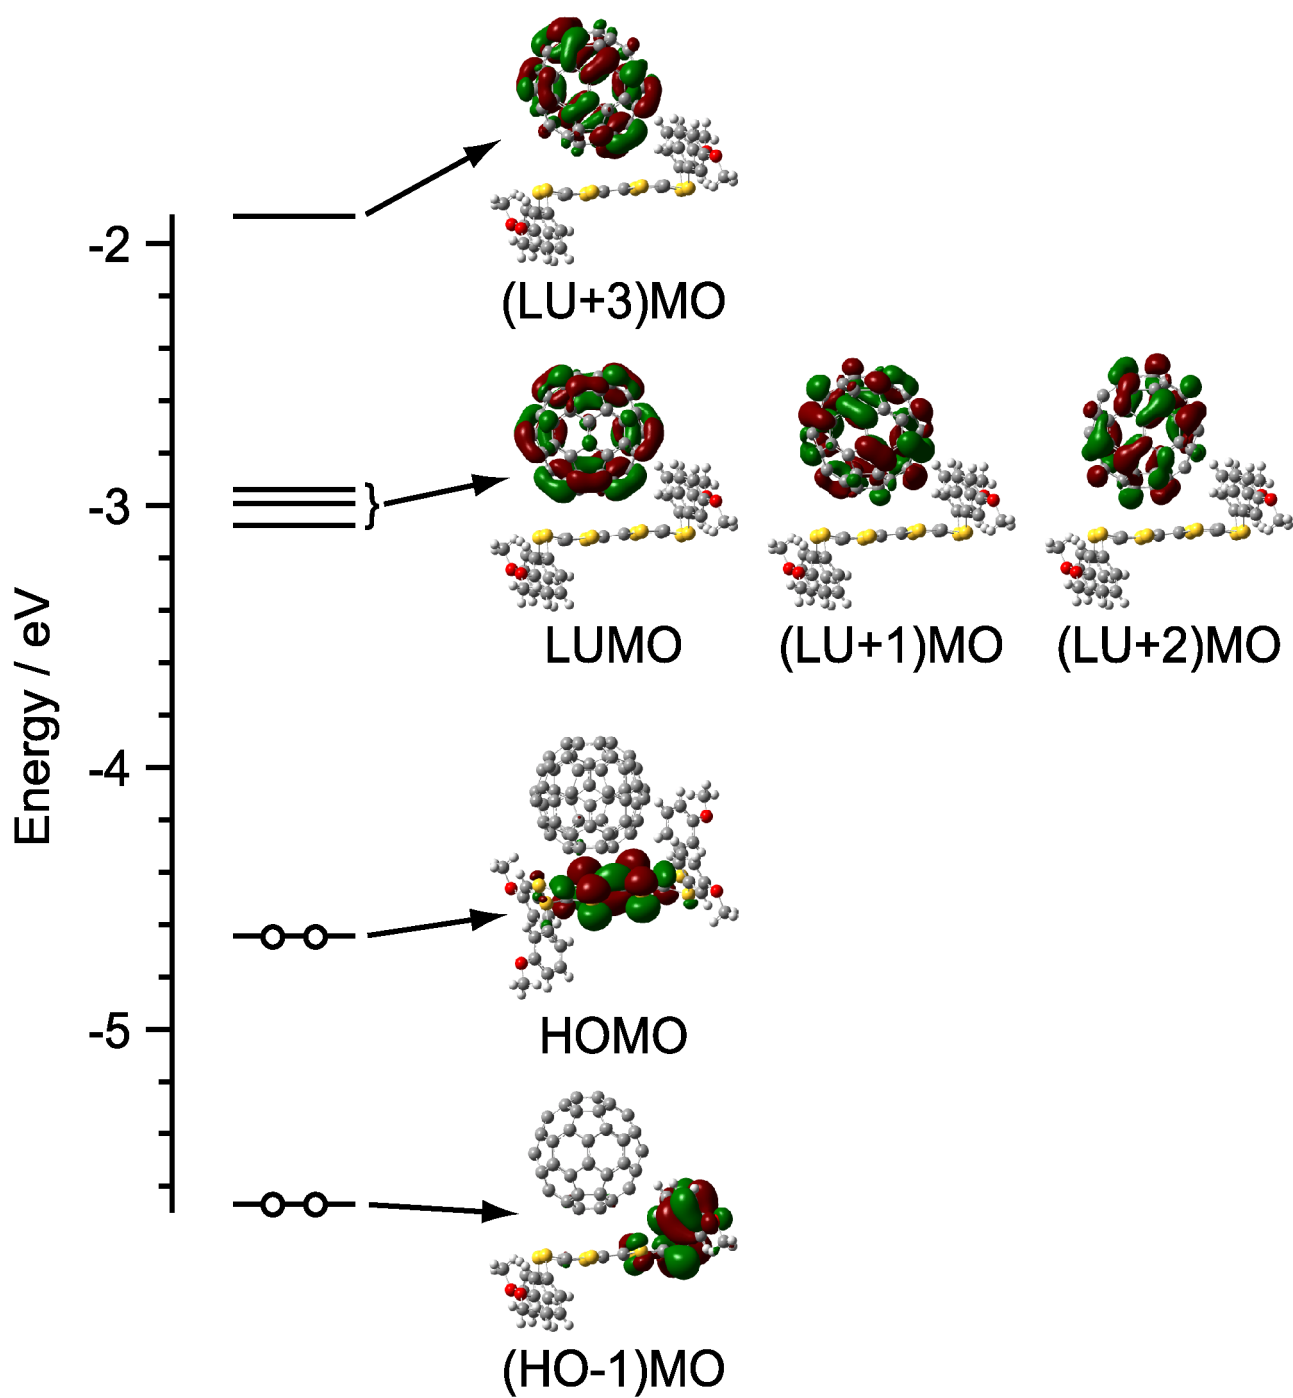

**Fig. S24** Energy diagram of frontier Kohn-Sham orbitals for TTF1•C<sub>60</sub> cluster calculated at the B3LYP/6-31G(d,p) level of theory.

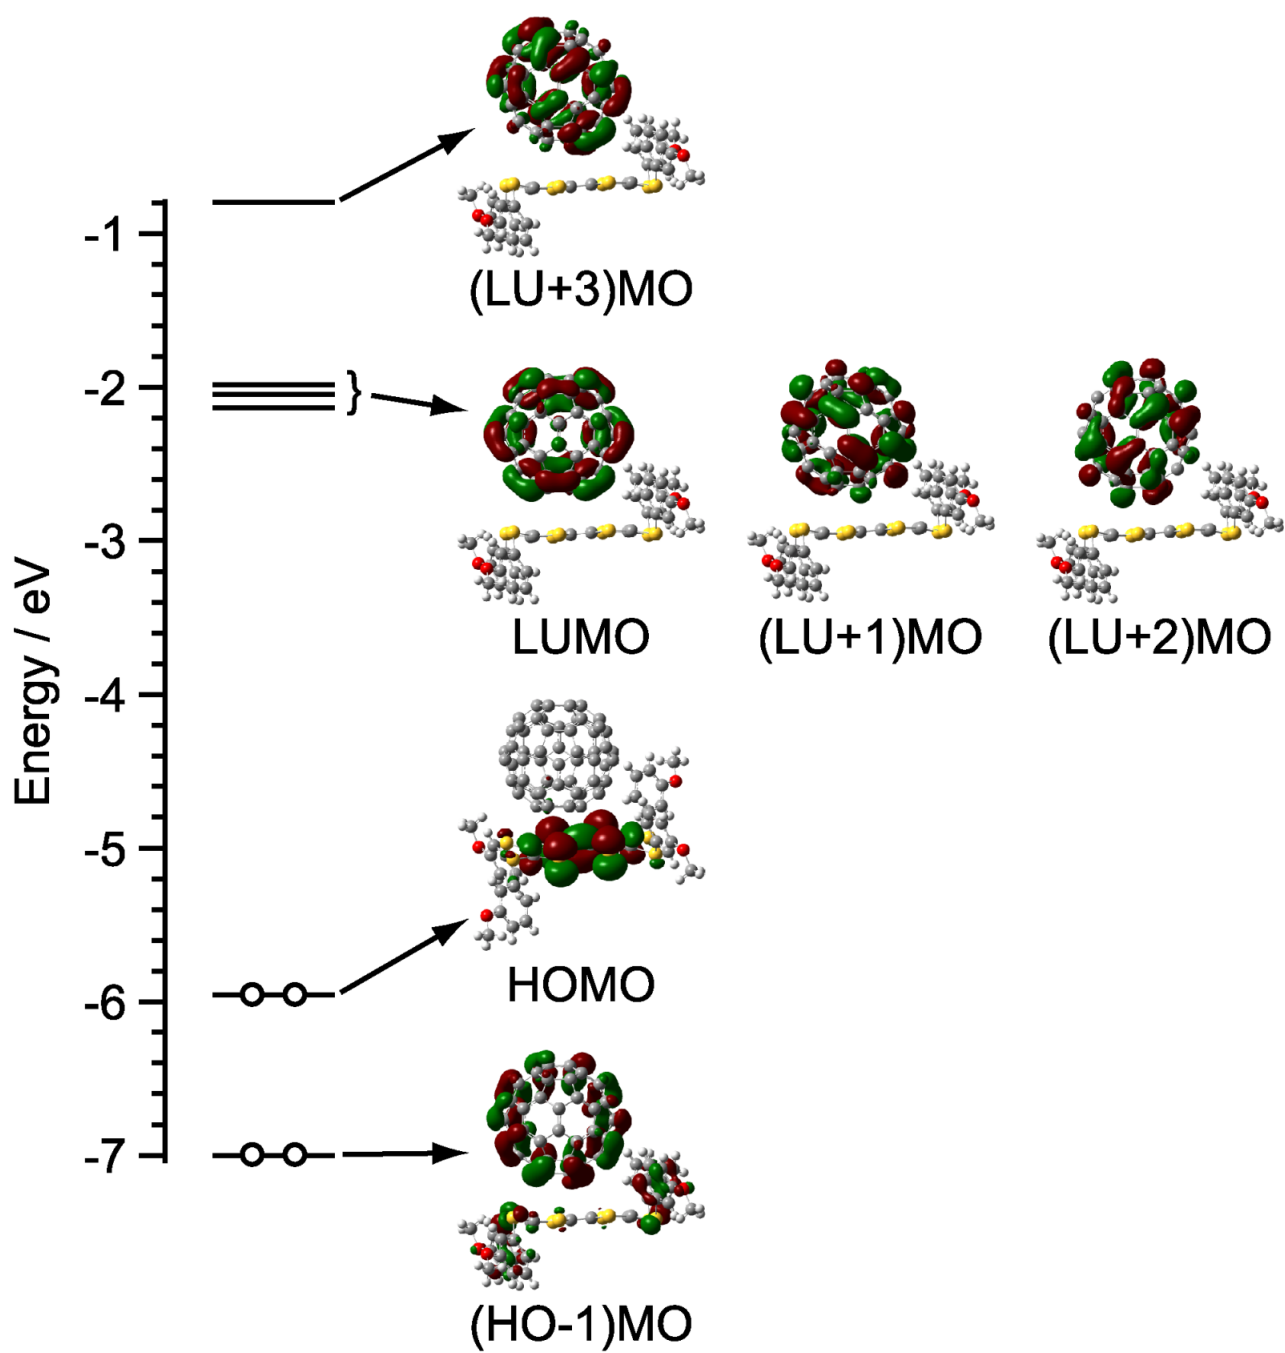

**Fig. S25** Energy diagram of frontier Kohn-Sham orbitals for TTF1•C<sub>60</sub> cluster calculated at the CAM-B3LYP/6-31G(d,p) level of theory.



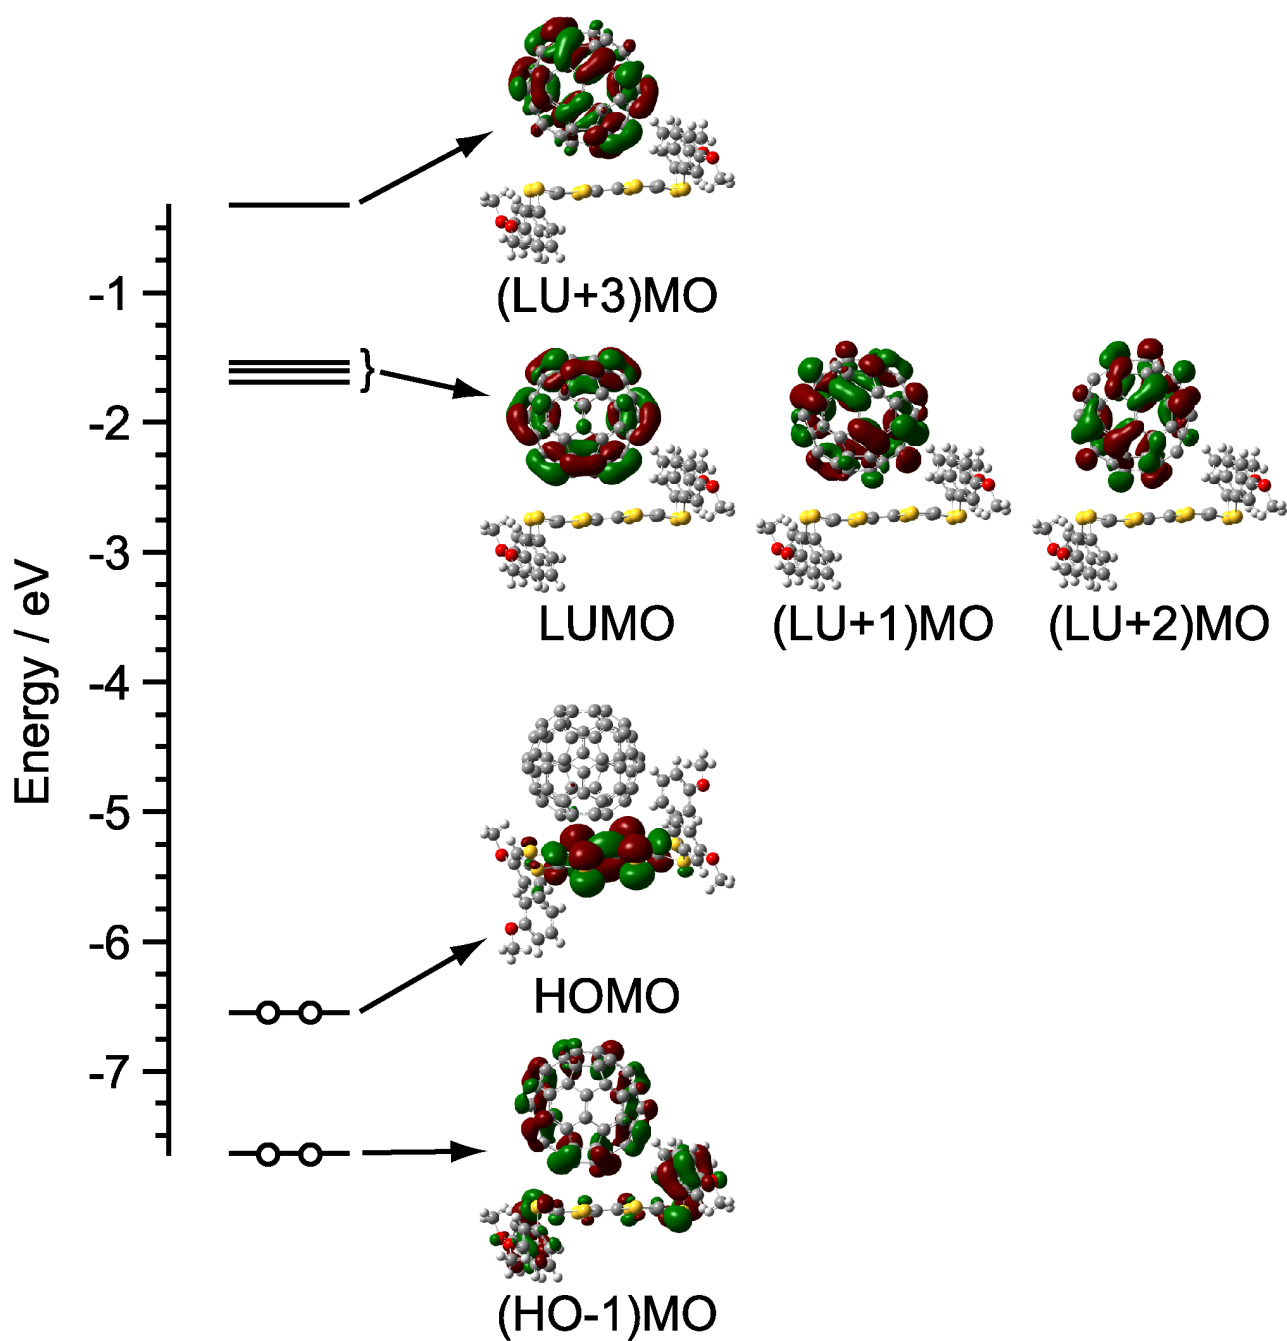

**Fig. S26** Energy diagram of frontier Kohn-Sham orbitals for **TTF1•C<sub>60</sub>** cluster calculated at the  $\omega$ B97X-D/6-31G(d,p) level of theory.

**Table S5.** Excitation energies ( $\Delta E$ ), oscillator strengths ( $f$ ), assignments, and charges<sup>[a]</sup> of TTF3, C<sub>70</sub>(L), and C<sub>70</sub>(R) molecules by Mulliken and natural population analyses (NPA) in the ground (S<sub>0</sub>) and low-lying excited (S<sub>1</sub>, S<sub>2</sub>, S<sub>3</sub>, S<sub>4</sub>, S<sub>5</sub>, and S<sub>6</sub>) states for TTF3·(C<sub>70</sub>)<sub>2</sub> cluster calculated at the TD-(B3LYP, CAM-B3LYP, and  $\omega$ B97X-D)/6-31G(d,p) levels of theory.

| State            | $\Delta E$ / eV | $f$    | Assignment                                                                                                              | TTF3<br>C <sub>70</sub> (L)/C <sub>70</sub> (R) |                         |
|------------------|-----------------|--------|-------------------------------------------------------------------------------------------------------------------------|-------------------------------------------------|-------------------------|
|                  |                 |        |                                                                                                                         | Mulliken                                        | NPA                     |
| <b>B3LYP</b>     |                 |        |                                                                                                                         |                                                 |                         |
| S <sub>0</sub>   |                 |        |                                                                                                                         | -0.053<br>+0.040/+0.013                         | +0.065<br>-0.025/-0.040 |
| S <sub>1</sub>   | 1.188           | 0.0086 | HO → LU (91%)<br>HO → LU+2 (5%)<br>HO → LU+1 (4%)                                                                       | +0.779<br>-0.829/+0.050                         | +0.955<br>-0.941/-0.015 |
| S <sub>2</sub>   | 1.239           | 0.0009 | HO → LU+2 (95%)<br>HO → LU (5%)                                                                                         | +0.788<br>-0.837/+0.049                         | +0.967<br>-0.951/-0.015 |
| S <sub>3</sub>   | 1.327           | 0.0021 | HO → LU+1 (96%)<br>HO → LU (4%)                                                                                         | +0.789<br>-0.840/+0.052                         | +0.964<br>-0.951/-0.014 |
| S <sub>4</sub>   | 1.482           | 0.0085 | HO → LU+3 (95%)<br>HO → LU+5 (3%)                                                                                       | +0.786<br>+0.073/-0.859                         | +0.962<br>-0.000/-0.961 |
| S <sub>5</sub>   | 1.573           | 0.0072 | HO → LU+4 (89%)<br>HO → LU+5 (10%)                                                                                      | +0.789<br>+0.074/-0.863                         | +0.964<br>+0.000/-0.965 |
| S <sub>6</sub>   | 1.634           | 0.0000 | HO → LU+5 (86%)<br>HO → LU+4 (10%)<br>HO → LU+3 (3%)                                                                    | +0.792<br>+0.075/-0.867                         | +0.965<br>+0.001/-0.966 |
| <b>CAM-B3LYP</b> |                 |        |                                                                                                                         |                                                 |                         |
| S <sub>0</sub>   |                 |        |                                                                                                                         | -0.068<br>+0.048/+0.021                         | +0.049<br>-0.017/-0.032 |
| S <sub>1</sub>   | 2.215           | 0.0099 | HO → LU+2 (54%)<br>HO → LU+1 (21%)<br>HO → LU (9%)<br>HO-4 → LU+3 (5%)<br>HO-5 → LU (4%)                                | +0.624<br>-0.666/+0.042                         | +0.790<br>-0.771/-0.020 |
| S <sub>2</sub>   | 2.295           | 0.0009 | HO-1 → LU+4 (40%)<br>HO-2 → LU+3 (33%)<br>HO-3 → LU+5 (11%)<br>HO-2 → LU+4 (6%)<br>HO-1 → LU+3 (3%)<br>HO-1 → LU+5 (2%) | -0.065<br>+0.048/+0.018                         | +0.052<br>-0.017/-0.035 |

|                |       |        |                                                                                                                                       |                         |                         |
|----------------|-------|--------|---------------------------------------------------------------------------------------------------------------------------------------|-------------------------|-------------------------|
| S <sub>3</sub> | 2.305 | 0.0009 | HO-5 → LU (29%)<br>HO-4 → LU+1 (27%)<br>HO → LU+2 (16%)<br>HO-5 → LU+1 (6%)<br>HO-7 → LU+2 (5%)<br>HO-4 → LU (5%)<br>HO-4 → LU+2 (3%) | +0.103<br>-0.129/+0.026 | +0.232<br>-0.203/-0.029 |
| S <sub>4</sub> | 2.414 | 0.0079 | HO → LU (71%)<br>HO → LU+2 (13%)<br>HO-4 → LU (4%)<br>HO → LU+1 (2%)                                                                  | +0.657<br>-0.701/+0.045 | +0.822<br>-0.804/-0.018 |
| S <sub>5</sub> | 2.507 | 0.0148 | HO → LU+3 (43%)<br>HO-1 → LU+3 (22%)<br>HO → LU+5 (8%)<br>HO-1 → LU+4 (7%)<br>HO → LU+10 (4%)<br>HO-1 → LU+5 (3%)                     | +0.346<br>+0.059/-0.404 | +0.490<br>-0.010/-0.481 |
| S <sub>6</sub> | 2.536 | 0.0095 | HO-4 → LU (25%)<br>HO-4 → LU+1 (25%)<br>HO-5 → LU (11%)<br>HO → LU+1 (10%)<br>HO-4 → LU+2 (5%)<br>HO → LU+2 (3%)<br>HO-5 → LU+2 (2%)  | +0.026<br>-0.051/+0.025 | +0.148<br>-0.118/-0.030 |
| <b>ωB97X-D</b> |       |        |                                                                                                                                       |                         |                         |
| S <sub>0</sub> |       |        |                                                                                                                                       | -0.058<br>+0.040/+0.019 | +0.049<br>-0.017/-0.032 |
| S <sub>1</sub> | 2.294 | 0.0038 | HO-4 → LU+1 (35%)<br>HO-5 → LU (28%)<br>HO-7 → LU+2 (8%)<br>HO → LU+2 (6%)<br>HO → LU+1 (5%)<br>HO-4 → LU+2 (4%)<br>HO-5 → LU+1 (3%)  | +0.020<br>-0.041/+0.021 | +0.133<br>-0.103/-0.031 |
| S <sub>2</sub> | 2.309 | 0.0008 | HO-1 → LU+4 (45%)<br>HO-2 → LU+3 (32%)<br>HO-3 → LU+5 (12%)<br>HO-2 → LU+4 (3%)                                                       | -0.057<br>+0.040/+0.018 | +0.050<br>-0.017/-0.033 |
| S <sub>3</sub> | 2.414 | 0.0104 | HO → LU+2 (59%)<br>HO → LU+1 (20%)<br>HO-5 → LU (6%)<br>HO-4 → LU+1 (4%)<br>HO → LU (3%)                                              | +0.672<br>-0.711/+0.039 | +0.830<br>-0.809/-0.021 |

|                   |               |               |                   |               |               |
|-------------------|---------------|---------------|-------------------|---------------|---------------|
| S <sub>4</sub>    | 2.589         | 0.0887        | HO-4 → LU (19%)   | -0.039        | +0.070        |
|                   |               |               | HO-5 → LU (14%)   | +0.020/+0.019 | -0.038/-0.032 |
|                   |               |               | HO-4 → LU+1 (11%) |               |               |
|                   |               |               | HO-1 → LU+3 (10%) |               |               |
|                   |               |               | HO-2 → LU+3 (8%)  |               |               |
|                   |               |               | HO-5 → LU+1 (6%)  |               |               |
|                   |               |               | HO-1 → LU+4 (5%)  |               |               |
|                   |               |               | HO-2 → LU+4 (2%)  |               |               |
|                   |               |               | S <sub>5</sub>    | 2.591         | 0.0411        |
| HO-1 → LU+3 (16%) | +0.032/+0.017 | -0.026/-0.034 |                   |               |               |
| HO-1 → LU+4 (12%) |               |               |                   |               |               |
| HO-4 → LU (9%)    |               |               |                   |               |               |
| HO-5 → LU (7%)    |               |               |                   |               |               |
| HO-4 → LU+1 (5%)  |               |               |                   |               |               |
| HO-2 → LU+4 (5%)  |               |               |                   |               |               |
| HO-3 → LU+3 (4%)  |               |               |                   |               |               |
| HO-5 → LU+1 (3%)  |               |               |                   |               |               |
| HO-3 → LU+4 (2%)  |               |               |                   |               |               |
| S <sub>6</sub>    | 2.614         | 0.0129        |                   |               |               |
|                   |               |               | HO-1 → LU+5 (10%) | +0.037/-0.066 | -0.022/-0.122 |
|                   |               |               | HO → LU+3 (8%)    |               |               |
|                   |               |               | HO-2 → LU+3 (6%)  |               |               |
|                   |               |               | HO-1 → LU+4 (6%)  |               |               |
|                   |               |               | HO-3 → LU+4 (5%)  |               |               |
|                   |               |               | HO → LU+5 (5%)    |               |               |
|                   |               |               | HO-3 → LU+5 (4%)  |               |               |
|                   |               |               | HO-3 → LU+3 (3%)  |               |               |
|                   |               |               | HO-4 → LU (2%)    |               |               |

[a] The charge of TTF3 molecule is shown in the top line, and the charges of C<sub>70</sub> molecules are shown in the bottom line, in the form of the charge of C<sub>70</sub>(L)/the charge of C<sub>70</sub>(R).

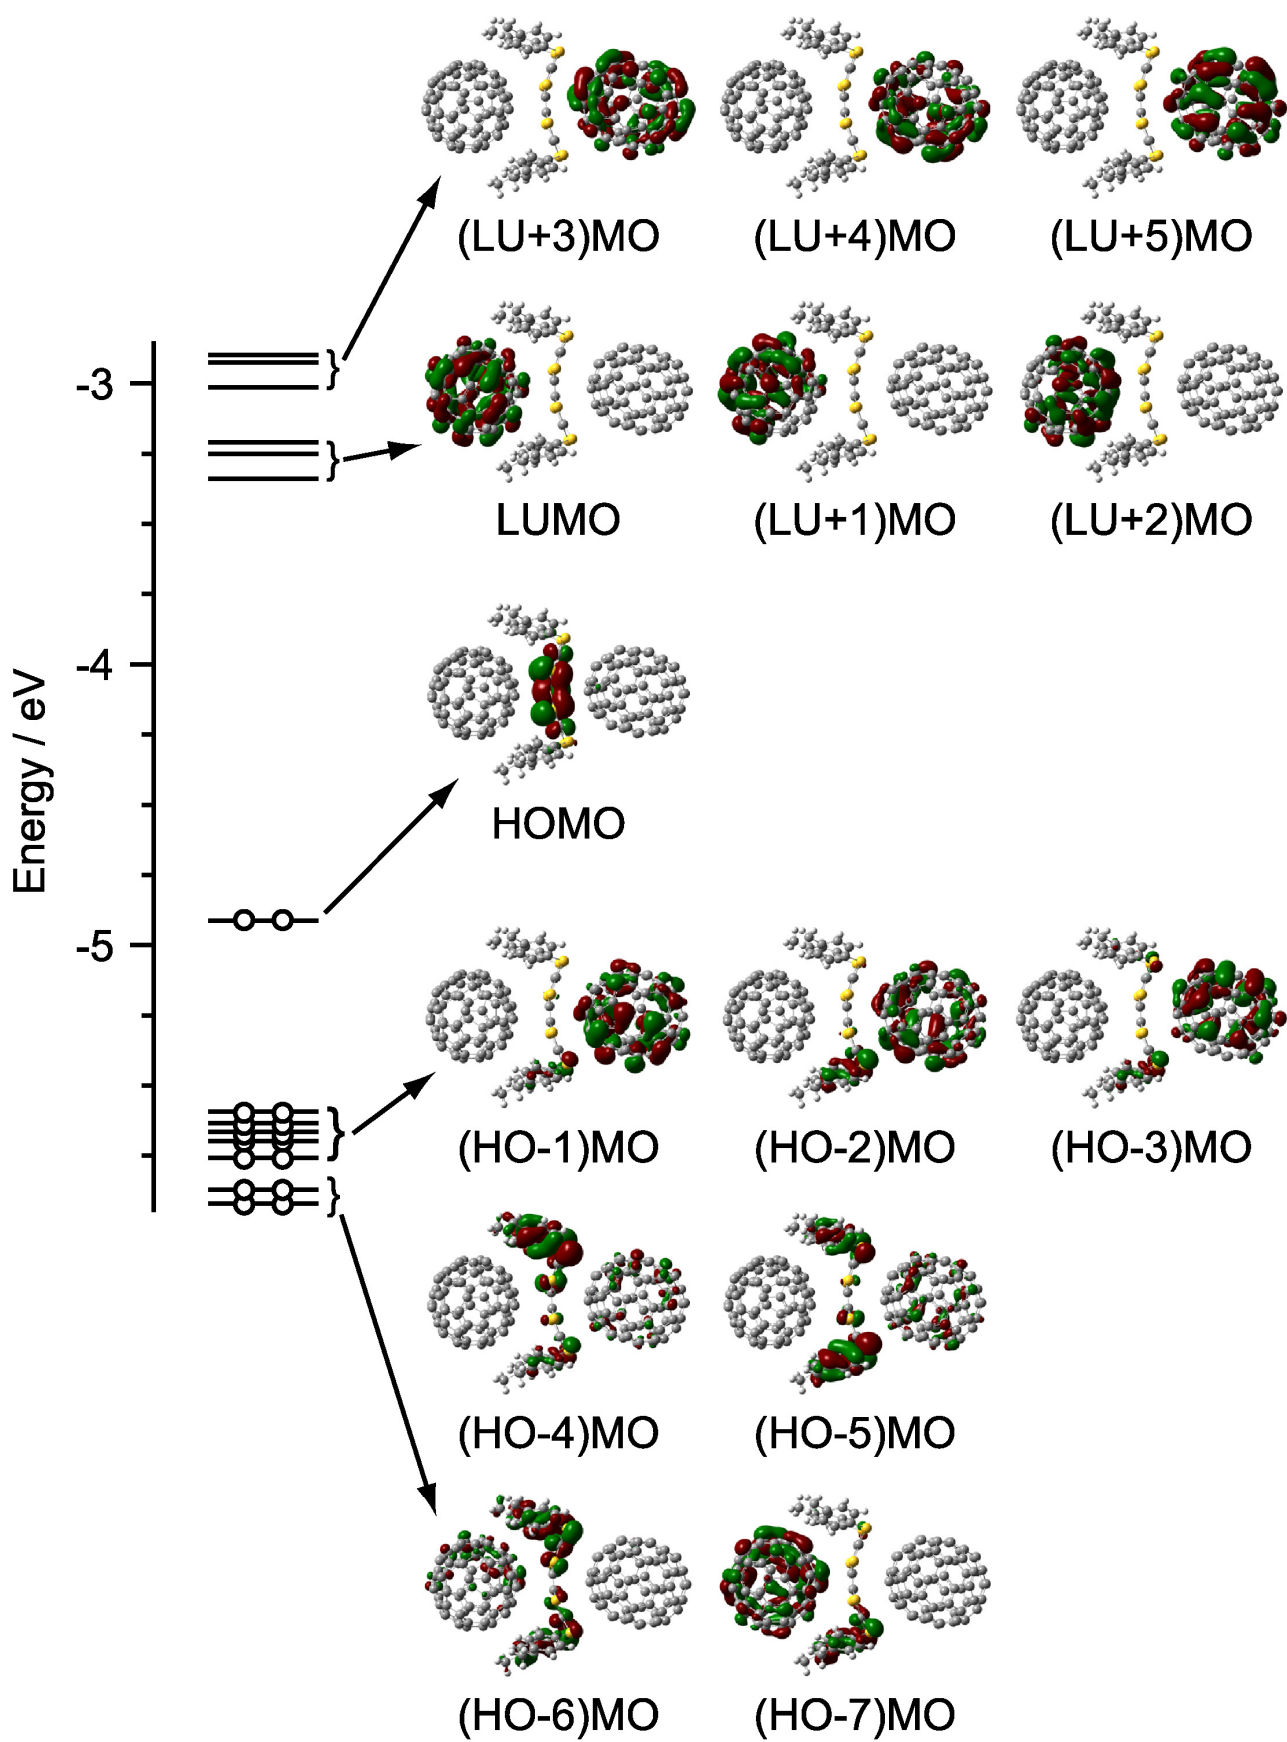

**Fig. S27** Energy diagram of frontier Kohn-Sham orbitals for  $[C_{70}(L)\text{-TTF3}(A)\text{-}C_{70}(R)]$  cluster calculated at the B3LYP/6-31G(d,p) level of theory.

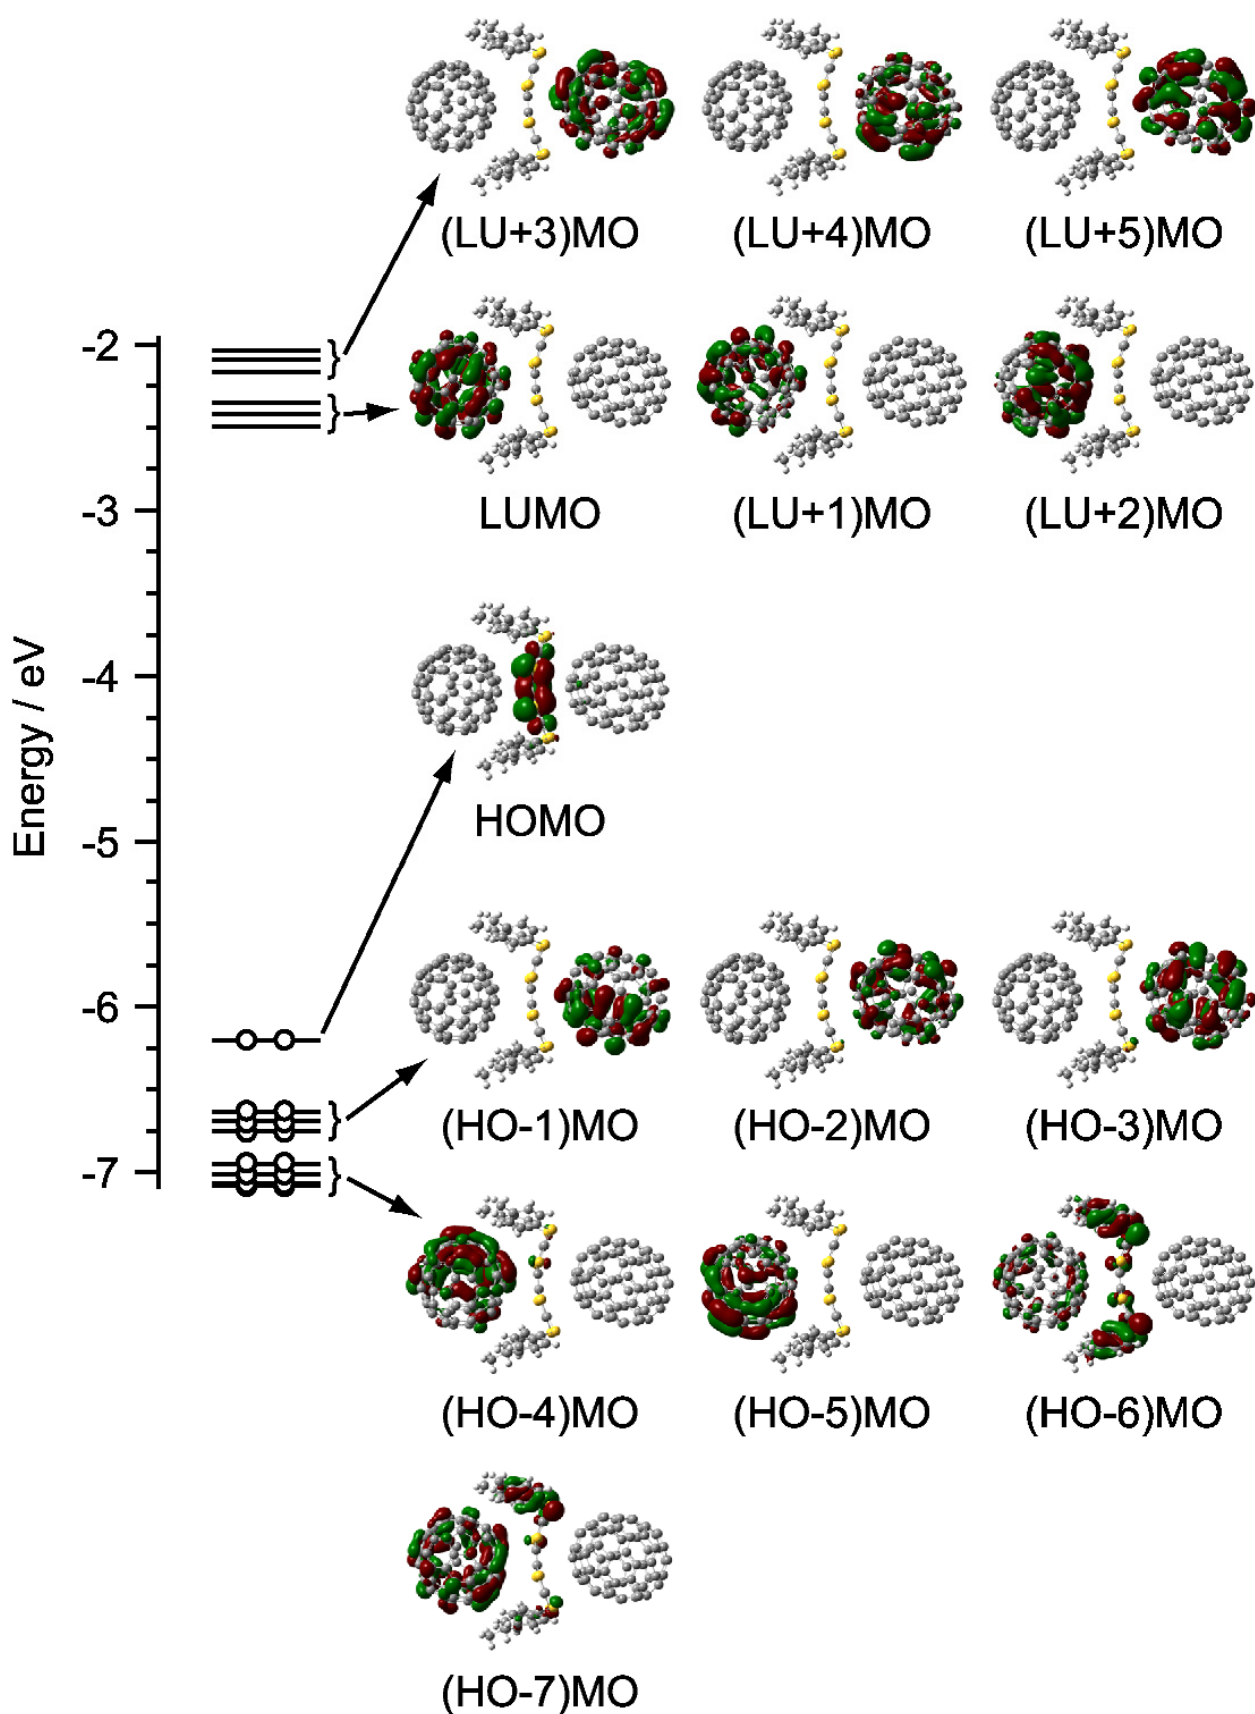

**Fig. S28** Energy diagram of frontier Kohn-Sham orbitals for  $[C_{70}(L)\text{-TTF3}(A)\text{-}C_{70}(R)]$  cluster calculated at the CAM-B3LYP/6-31G(d,p) level of theory.

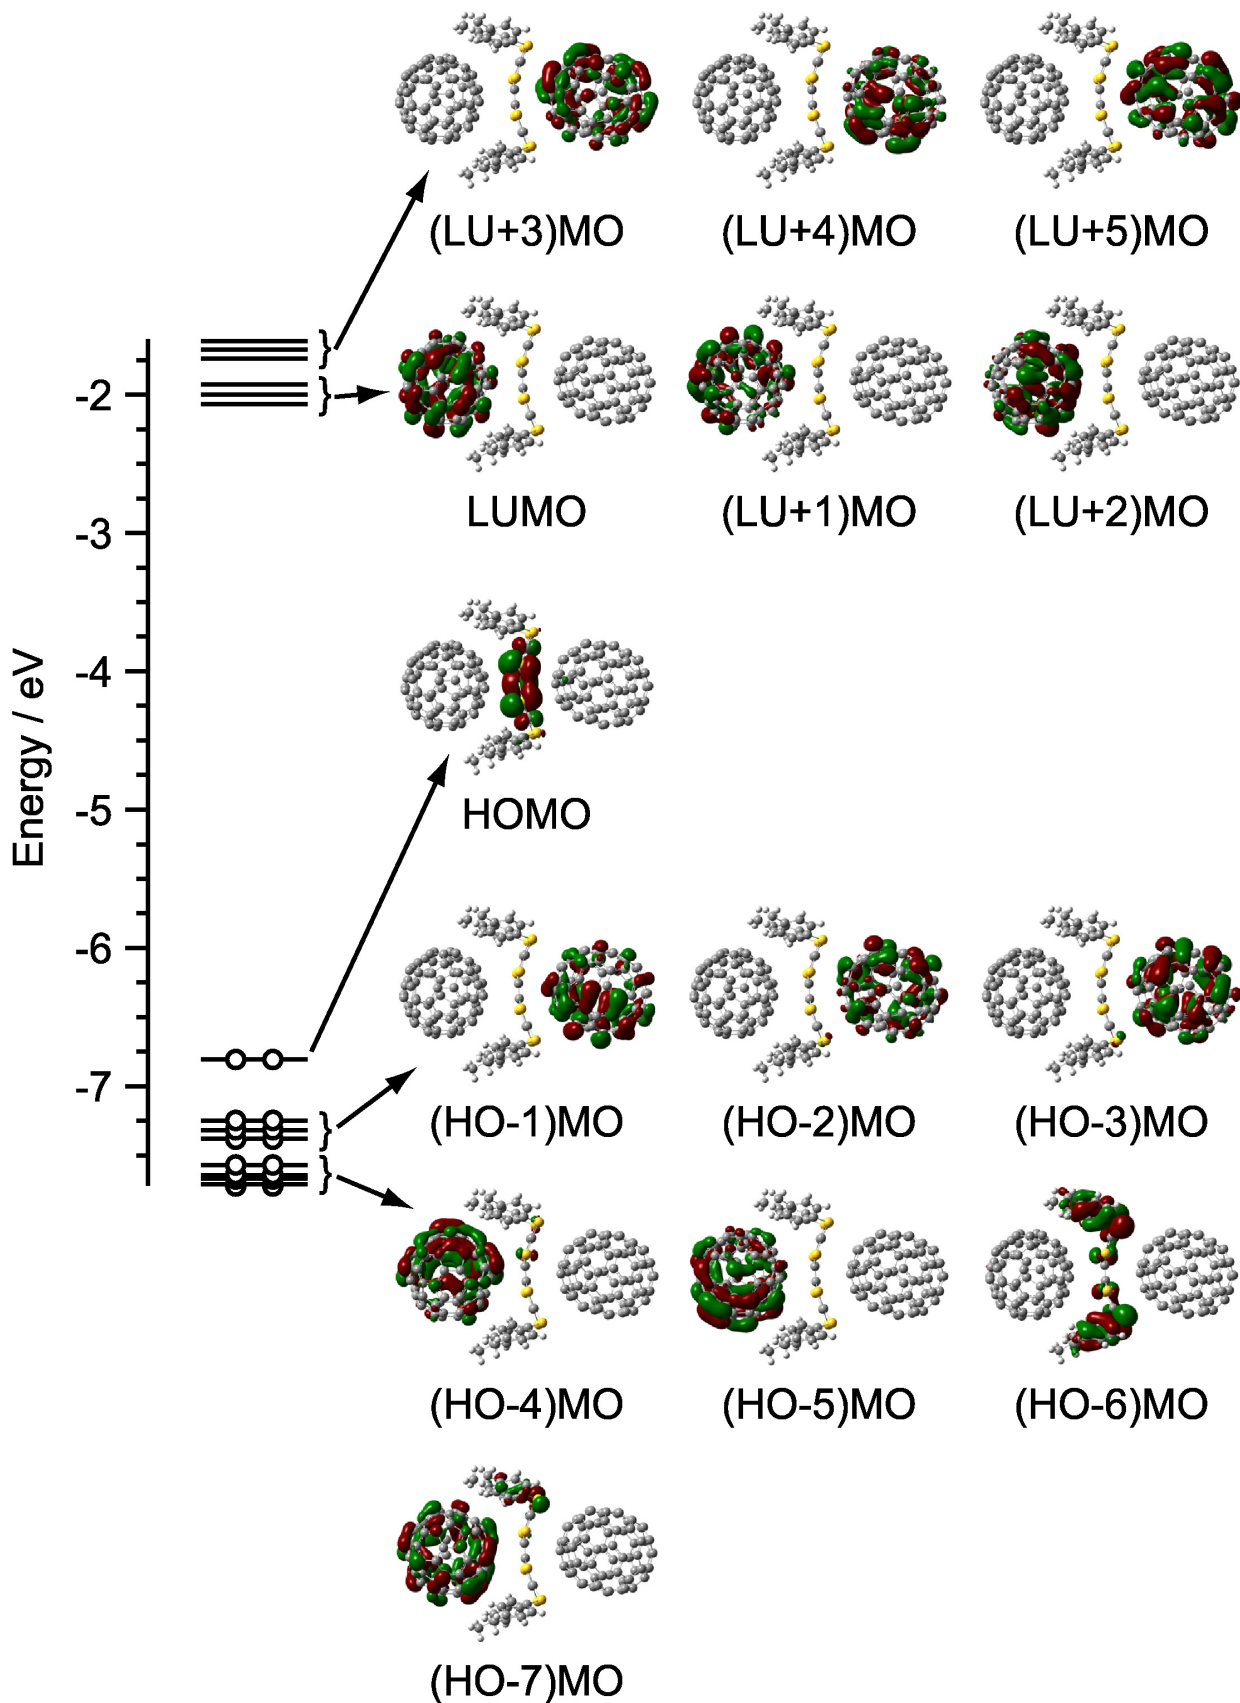

**Fig. S29** Energy diagram of frontier Kohn-Sham orbitals for  $[C_{70}(L)\text{-TTF3}(A)\text{-}C_{70}(R)]$  cluster calculated at the  $\omega$ B97X-D/6-31G(d,p) level of theory.
